# Supplementary material for: Urban–rural disparity of social vulnerability to natural hazards in Australia
Source: PubMed Central journal article supplement (PMC9372054; doi:10.1038/s41598-022-17878-6), 2022-08-11
Supplement: 41598_2022_17878_MOESM1_ESM.pdf [file 41598_2022_17878_MOESM1_ESM.pdf]

# Supplementary Materials

## Table of Contents

|                                                                                             |    |
|---------------------------------------------------------------------------------------------|----|
| Table 1.....                                                                                | 3  |
| Note 1 (Study area).....                                                                    | 6  |
| Table S2.....                                                                               | 7  |
| Note 2 (Identified indicators for Theme 2 to 5).....                                        | 10 |
| Table S3.....                                                                               | 12 |
| Table S4.....                                                                               | 13 |
| Table S5.....                                                                               | 14 |
| Table S6.....                                                                               | 15 |
| Note 3 (Details of the most vulnerable areas in capital cities).....                        | 16 |
| Figure S2. ....                                                                             | 17 |
| Figure S3. ....                                                                             | 18 |
| Figure S4. ....                                                                             | 19 |
| Figure S5. ....                                                                             | 20 |
| Figure S6. ....                                                                             | 21 |
| Table S7.....                                                                               | 22 |
| Table S8.....                                                                               | 23 |
| Figure S7. ....                                                                             | 24 |
| Table S9.....                                                                               | 24 |
| Figure S8. ....                                                                             | 25 |
| Figure S9. ....                                                                             | 26 |
| Note 4 (Details of the most vulnerable and highly risky areas in eight capital cities)..... | 27 |
| Table S10.....                                                                              | 27 |
| Table S11.....                                                                              | 28 |
| Note 5 ((Details of the most vulnerable areas highly risky in flood and wildfire).....      | 28 |
| Figure S10. ....                                                                            | 29 |
| Figure S11. ....                                                                            | 30 |
| Table S12.....                                                                              | 30 |
| Table S13.....                                                                              | 31 |
| Table S14.....                                                                              | 32 |
| Table S15.....                                                                              | 33 |
| Note 6 (Generating NDBI).....                                                               | 34 |

|                              |    |
|------------------------------|----|
| Table S16.....               | 35 |
| Table S17.....               | 37 |
| Table 18.....                | 37 |
| Figure S12.....              | 37 |
| Supplementary Reference..... | 38 |

**Table 1. Vulnerability concepts, linkage to hazards and expected effect**

| <b>Concept</b>      | <b>How it links to human responses to hazard</b>                                                                                                                                                                                                 | <b>Source</b>                                                                                                                                 | <b>Expected effect (+/-) on vulnerability</b> |
|---------------------|--------------------------------------------------------------------------------------------------------------------------------------------------------------------------------------------------------------------------------------------------|-----------------------------------------------------------------------------------------------------------------------------------------------|-----------------------------------------------|
| Employment          | Unemployed persons do not have employee benefits that provide income and health insurance during hazards.                                                                                                                                        | Holand, Lujala et al. 2011, Aksha, Juran et al. 2019, Cumberbatch, Drakes et al. 2020                                                         | (+)                                           |
| Income              | Low-income families are less likely to have the income or assets needed for preparedness and recovery.                                                                                                                                           | Cutter, Mitchell et al. 2000, Wigtil, Hammer et al. 2016, Aksha, Juran et al. 2019                                                            | (+)                                           |
| Education           | People with lower levels of education are less likely to have access to and act upon varied hazard information from preparation to recovery.                                                                                                     | Tierney 2011, Wigtil, Hammer et al. 2016, Krishnan, Ananthan et al. 2019                                                                      | (+)                                           |
| Occupation          | Those who work in the low-skilled sectors are more likely to lose their jobs in cases of hazards, which in turn contributes to slower recovery.                                                                                                  | Holand, Lujala et al. 2011, Cutter, Ash et al. 2014, Kirby, Reams et al. 2019                                                                 | (+)                                           |
| Elderly             | Elderly, especially those who live alone, who have physical, sensory, or cognitive challenges are likely to be more difficult to evacuate and recover during and after hazards.                                                                  | Cutter, Mitchell et al. 2000, Peek-Asa, Ramirez et al. 2003, Rosenkoetter, Covan et al. 2007, Holand, Lujala et al. 2011                      | (+)                                           |
| Children            | Children, especially in the youngest age groups, cannot protect themselves during hazards because lack the necessary resources, knowledge, or life experiences to cope with the situation.                                                       | Cutter, Mitchell et al. 2000, Cutter, Boruff et al. 2003, Martin, Bush et al. 2006, Cumberbatch, Drakes et al. 2020, Drakes, Tate et al. 2021 | (+)                                           |
| Median age          | Both high and low values of median age conceivably can indicate high vulnerability.                                                                                                                                                              | Cutter, Boruff et al. 2003, Burton and Cutter 2008, de Oliveira Mendes 2009, Wigtil, Hammer et al. 2016                                       | (+/-)                                         |
| Economic dependency | Families with large numbers of dependents may face difficulties to outsource care for dependents, and thus may need to balance work responsibilities and care for family members which could affect the resilience to and recovery from hazards. | Chen, Cutter et al. 2013, Krishnan, Ananthan et al. 2019, Drakes, Tate et al. 2021                                                            | (+)                                           |
| Gender              | Women may couple with household responsibilities which could be more vulnerable to recover from hazards compared to men.                                                                                                                         | Aksha, Juran et al. 2019, Kirby, Reams et al. 2019, Krishnan, Ananthan et al. 2019, Cumberbatch, Drakes et al. 2020                           | (+)                                           |
| Family composition  | More persons within a household could increase the economic burden of evacuation and recovery from hazards.                                                                                                                                      | De Oliveira Mendes 2009, Akinola, Adegoke et al. 2019, Drakes, Tate et al. 2021                                                               | (+)                                           |
| Social dependency   | Caring for children may impact parents' preparation of evacuation and recovery. Parents may lose time and money caring for children when daycare facilities are affected during hazards.                                                         | Chen, Cutter et al. 2013, Nicholson, Attal-Juncqua et al. 2021; De Oliveira Mendes 2009, Chen, Cutter et al. 2013                             | (+)                                           |

|                                |                                                                                                                                                                                                                                                                                                                             |                                                                                                                                                                                                      |       |
|--------------------------------|-----------------------------------------------------------------------------------------------------------------------------------------------------------------------------------------------------------------------------------------------------------------------------------------------------------------------------|------------------------------------------------------------------------------------------------------------------------------------------------------------------------------------------------------|-------|
| Need assistance                | Special needs populations may encounter difficulties during evacuation. They could also be invisible in communities and societies during the recovery phase.                                                                                                                                                                | Flanagan, Gregory et al. 2011, Chen, Cutter et al. 2013, Cutter, Ash et al. 2014, Akinola, Adegoke et al. 2019, Aksha, Juran et al. 2019                                                             | (+)   |
| Marital status                 | Single/separated adults earn less than those who are currently married. This economic gap could increase their vulnerability to hazards recovery. The emotional support from partners may also reduce individuals' vulnerability during hazards.                                                                            | Akinola, Adegoke et al. 2019, Drakes, Tate et al. 2021                                                                                                                                               | (+)   |
| Minority (migrants/immigrants) | Immigrants may be unfamiliar with local resources which could increase the difficulties to navigating the resource and receiving updated information on disaster preparedness and recovery. Immigrants are likelier to rely on local social networks which may impact their ability to evaluate to other cities and states. | Cutter, Boruff et al. 2003, Burton and Cutter 2008, Schmidlein, Deutsch et al. 2008, Holand, Lujala et al. 2011, Aksha, Juran et al. 2019                                                            | (+)   |
| English                        | Limited English proficiency could impact individuals' ability to access updated information on hazards.                                                                                                                                                                                                                     | Cutter, Ash et al. 2014, Wigtil, Hammer et al. 2016, Berke, Yu et al. 2019, Drakes, Tate et al. 2021; Solangaarachchi, Griffin et al. 2012, Wigtil, Hammer et al. 2016, Akinola, Adegoke et al. 2019 | (+)   |
| Ethnicity                      | Being ethnic minority is associated with lower access to updated information on hazards and lower allocations of hazards-related assistance.                                                                                                                                                                                | Cutter, Boruff et al. 2003, Burton and Cutter 2008, Chen, Cutter et al. 2013, Wigtil, Hammer et al. 2016, Drakes, Tate et al. 2021                                                                   | (+)   |
| Housing structure              | People living in multi-unit apartments/houses are vulnerable to overcrowding when funneled into a limited number of exit stairwells during hazard evacuation.                                                                                                                                                               | Cutter, Boruff et al. 2003, Flanagan, Gregory et al. 2011, Berke, Yu et al. 2019                                                                                                                     | (+)   |
| Paying mortgage                | House owners need to continue to pay mortgage even if their home is destroyed or unliveable due to a disaster. House owners have to repair or rebuild their house at their own expense which could increase their burden during recovery.                                                                                   | De Oliveira Mendes, 2009                                                                                                                                                                             | (+)   |
| Mobile living                  | Mobile homes are not designed to withstand severe weather or flooding which are easily destroyed and less resilient to hazards. They are also frequently found outside of metropolitan areas which may not be readily accessible by interstate highways or public transportation.                                           | Cutter, Mitchell et al. 2000, Cutter, Boruff et al. 2003, Burton and Cutter 2008, Wigtil, Hammer et al. 2016, Drakes, Tate et al. 2021                                                               | (+/-) |
| Car ownership                  | Transportation out of an evacuation zone is problematic for people who do not have access to a vehicle to evaluate during hazards.                                                                                                                                                                                          | Flanagan, Gregory et al. 2011, Cutter, Ash et al. 2014, Wigtil, Hammer et al. 2016, Drakes, Tate et al. 2021                                                                                         | (+)   |
| Internet access                | Households with no internet connection may have difficulties receiving updated information on hazards.                                                                                                                                                                                                                      | Solangaarachchi, Griffin et al. 2012, Cutter, Ash et al. 2014                                                                                                                                        | (+)   |

|                               |                                                                                                                                                                                               |                                                                                                                                         |       |
|-------------------------------|-----------------------------------------------------------------------------------------------------------------------------------------------------------------------------------------------|-----------------------------------------------------------------------------------------------------------------------------------------|-------|
| Rental                        | People that rent do so because they are either transient or do not have the financial resources for homeownership. They often lack access to information about financial aid during recovery. | De Oliveira Mendes 2009, Chen, et al. 2013, Aksha, et al. 2019; Burton and Cutter 2008, Solangaarachchi et al. 2012, Kirby, et al. 2019 | (+)   |
| Housing type                  | The poor physical and social living conditions in overcrowded households could contribute to increased social vulnerability during hazard recovery.                                           | De Oliveira Mendes 2009, Flanagan, Gregory et al. 2011, Berke, Yu et al. 2019                                                           | (+)   |
| Distance to cities            | Cities could be more vulnerable to hazards due to building density; they could also be less vulnerable due to better access to resources and transportation for evacuation and recovery.      | Mainali and Pricope 2017, Krishnan, Ananthan et al. 2019                                                                                | (+/-) |
| Access to public transits     | Access to public transportation plays an important role in rapid evacuation, especially for those who do not have access to a vehicle.                                                        | Flanagan, Gregory et al. 2011, Kirby, Reams et al. 2019                                                                                 | (+)   |
| Density of commercial places  | Easy access to commercial places could help with hazard preparedness. Many commercial places are also used as shelters which may also help with hazard recovery.                              | Burton and Cutter 2008, de Oliveira Mendes 2009, Cutter, Ash et al. 2014, Krishnan, Ananthan et al. 2019                                | (+)   |
| Density of public service     | Long distance to public services during hazards may increase hazards related damage.                                                                                                          | De Oliveira Mendes 2009, Kirby, Reams et al. 2019                                                                                       | (+)   |
| Road access                   | Long distance to roads could increase the difficulties of evacuation.                                                                                                                         | Cutter, Ash et al. 2014, Kumar and Bhattacharjya 2020                                                                                   | (+)   |
| Density of hospitals          | Hazards may cause injuries and other health issues. Long distance to healthcare service decrease the possibility to obtaining efficient medical treatment.                                    | Burton and Cutter 2008, de Oliveira Mendes 2009, Holand, Lujala et al. 2011, Chen, Cutter et al. 2013, Krishnan, Ananthan et al. 2019   | (+)   |
| Density of buildings          | The higher the density of building shows the higher concentration of people, economic activity, traffic, and built structures, which lead to greater potential losses resulting from hazards. | Cutter, Boruff et al. 2003, Burton and Cutter 2008, Holand, Lujala et al. 2011, Chen, Cutter et al. 2013                                | (+)   |
| Density of roads and railways | Length of roads and railways represents lifelines and an ability to move people away from an area, which indicates a level of evacuation potential.                                           | Cutter, Ash et al. 2014, Kirby, Reams et al. 2019, Cumberbatch, Drakes et al. 2020                                                      | (-)   |
| Street design                 | Streets with stormwater drainage, water, and sewer are considered to be more resilient from hazards.                                                                                          | Berke, Yu et al. 2019, Prosdocimi and Klima 2020                                                                                        | (+)   |

### Note 1 (Study area)

Australia is the largest developed country in the Southern Hemisphere, with a total population of nearly 26 million and a total area of around 7.61 million square kilometres (Australia Bureau of Statistics (ABS), 2022). Australia is highly urbanised, with over 80% of its population living in cities. The nation's capital city is Canberra, also known as the Australian Capital Territory (ACT), and the other states/territories are (the state capital cities are listed in brackets): New South Wales (Sydney), Victoria (Melbourne), Queensland (Brisbane), West Australia (Perth), South Australia (Adelaide), Tasmania (Hobart), and Northern Territory (Darwin). According to the Greater Capital City Statistical Area Structure (ABS, 2016), each state is divided into a greater capital city area and the remaining regional/rural area. For instance, the State of New South Wales (NSW) is divided into the Greater Sydney Area and Rest of NSW. In this paper, we simplified the terminology using Sydney and Beyond Sydney to represent Greater Sydney and the Rest of NSW, respectively, in later analysis (Figure S1); such simplification also applied to other states/territories with the exception of ACT having only the capital city for the whole territory. Australia has a long history of natural hazards including wildfires (bushfires), floods, earthquakes, storms, cyclones and landslides. The impact associated with hazards also varies and can range from frequent moderate impacts (e.g. bushfires) through to rare but potentially catastrophic impacts (e.g. earthquakes). We selected three types of natural hazards (i.e., wildfires, floods and earthquakes) as wildfires and floods are the top two most notable and common natural hazards in Australia, and earthquakes have the wider impacts on both inland and coastal regions compared to storm surges and cyclones that happened more frequently but with impacts predominantly on coastal regions.

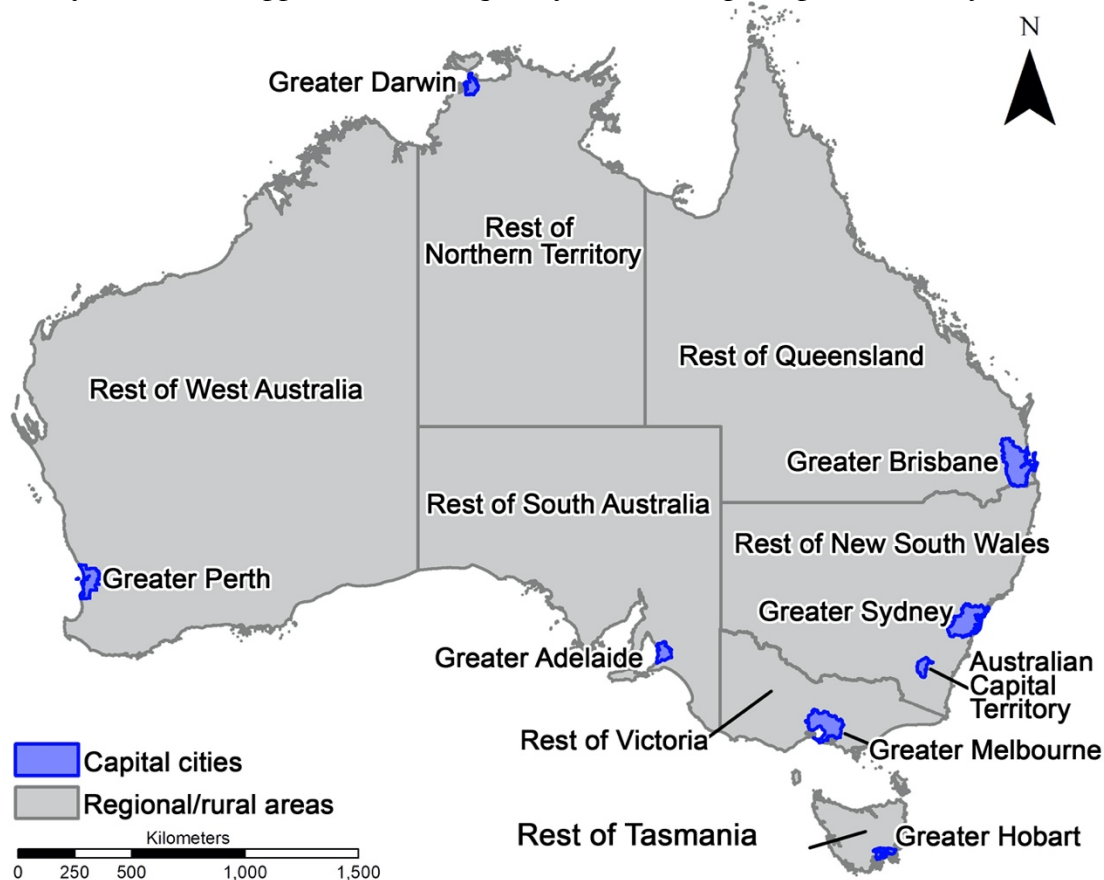

Figure S1. Geographic contexts of Australia

**Table S2.** Indicators used in the principal component analysis

| <b>Indicator</b>                                           | <b>Definition</b>                                                                                                                                                                                                                                                                                                                                                                                        |
|------------------------------------------------------------|----------------------------------------------------------------------------------------------------------------------------------------------------------------------------------------------------------------------------------------------------------------------------------------------------------------------------------------------------------------------------------------------------------|
| <b>Theme 1: Socioeconomic status</b> <sup>A</sup>          |                                                                                                                                                                                                                                                                                                                                                                                                          |
| Unemployed (%)                                             | Unemployed people over the total labour force                                                                                                                                                                                                                                                                                                                                                            |
| Low income (%)                                             | Households with weekly income less than \$800 over the total households                                                                                                                                                                                                                                                                                                                                  |
| Low education (%)                                          | People with the highest education level at high school or lower                                                                                                                                                                                                                                                                                                                                          |
| Non-MPA occupation (%)                                     | People with occupation not in manager, profession, and clerical and administration over the total pop                                                                                                                                                                                                                                                                                                    |
| <b>Theme 2: Demographics &amp; disability</b> <sup>A</sup> |                                                                                                                                                                                                                                                                                                                                                                                                          |
| Age above 65 (%)                                           | People with age at or above 65 over the total population                                                                                                                                                                                                                                                                                                                                                 |
| Age 0-18 (%)                                               | People with age at 0 to 18 over the total population                                                                                                                                                                                                                                                                                                                                                     |
| Median age (%)                                             | Weighted average age across all age groups                                                                                                                                                                                                                                                                                                                                                               |
| Not labour force (%)                                       | People not in the labour force over the total population                                                                                                                                                                                                                                                                                                                                                 |
| Female (%)                                                 | Female over the total population                                                                                                                                                                                                                                                                                                                                                                         |
| Multi-family HH (%)                                        | Households with two or more families over the total households                                                                                                                                                                                                                                                                                                                                           |
| Need child care (%)                                        | People with need for child care over the total population                                                                                                                                                                                                                                                                                                                                                |
| Need assistance (%)                                        | People who disabled and need assistance over the total population                                                                                                                                                                                                                                                                                                                                        |
| Children (%)                                               | People who had children over the total population                                                                                                                                                                                                                                                                                                                                                        |
| Not married (%)                                            | People not married over the total population                                                                                                                                                                                                                                                                                                                                                             |
| <b>Theme 3: Minority &amp; languages</b> <sup>A</sup>      |                                                                                                                                                                                                                                                                                                                                                                                                          |
| Minority (%)                                               | People born overseas (outside of Australia) over total population                                                                                                                                                                                                                                                                                                                                        |
| Bad English (%)                                            | Non-English-speaking people who speaks English ‘not well and not at all’ over the total population                                                                                                                                                                                                                                                                                                       |
| Non-English speaker (%)                                    | People with non-English native language over the total population                                                                                                                                                                                                                                                                                                                                        |
| Indigenous (%)                                             | Aboriginal people and Torres Strait Islanders over the total population                                                                                                                                                                                                                                                                                                                                  |
| Ethnic diversity (index)                                   | The Simpson’s index for ethnic diversity at SA1 level, calculated as:<br>$ED = 1 - \sum \frac{n_i^2}{N^2}$ , where $n_i$ = the number of people belonging to group i (i=5 cultural groups); N = total number of population, i = cultural groups by birthplace (continental): Oceania; Europe; Middle east and Africa; Asia; America. ED score ranges from 0 (minimum diversity) to 1 (maximum diversity) |
| <b>Theme 4: Housing characteristics</b> <sup>A</sup>       |                                                                                                                                                                                                                                                                                                                                                                                                          |
| Multi-unit houses (%)                                      | Multi-unit dwellings (including semi-detached, unit, flat, apartment) over the dwellings                                                                                                                                                                                                                                                                                                                 |
| Low mortgage (%)                                           | People who own houses and paying low mortgage (less than 2,000 AUD per month) over the total population                                                                                                                                                                                                                                                                                                  |
| Retired village (%)                                        | Retired villages over total dwellings                                                                                                                                                                                                                                                                                                                                                                    |

|                                                                      |                                                                                                                                                                                                                                                                                                                                                                                                                                                                                                                 |
|----------------------------------------------------------------------|-----------------------------------------------------------------------------------------------------------------------------------------------------------------------------------------------------------------------------------------------------------------------------------------------------------------------------------------------------------------------------------------------------------------------------------------------------------------------------------------------------------------|
| Mobile living (%)                                                    | Households living in mobile places (e.g., caravan park, camping sites, manufactured houses) over the total households                                                                                                                                                                                                                                                                                                                                                                                           |
| No car (%)                                                           | Dwellings without car over total dwellings                                                                                                                                                                                                                                                                                                                                                                                                                                                                      |
| No internet (%)                                                      | Dwellings without internet access over the total dwellings                                                                                                                                                                                                                                                                                                                                                                                                                                                      |
| Renters (%)                                                          | Renters over the total population                                                                                                                                                                                                                                                                                                                                                                                                                                                                               |
| Rent (%)                                                             | Rented dwellings over the total dwellings                                                                                                                                                                                                                                                                                                                                                                                                                                                                       |
| Small houses (%)                                                     | Dwellings with one bedroom over total dwellings                                                                                                                                                                                                                                                                                                                                                                                                                                                                 |
| <b>Theme 5: Built environment</b>                                    |                                                                                                                                                                                                                                                                                                                                                                                                                                                                                                                 |
| Distance to cities (m) <sup>B</sup>                                  | Distance to the nearest city/town centre (measured by the ‘near’ function in ArcGIS Pro 2.8)                                                                                                                                                                                                                                                                                                                                                                                                                    |
| Distance to public transits (m) <sup>B</sup>                         | Distance to the nearest public transit stop, including the stop of all types of public transits such as bus, tram, railway, and ferry stations (measured by the ‘near’ function in ArcGIS Pro 2.8)                                                                                                                                                                                                                                                                                                              |
| Distance to commercial (m) <sup>B</sup>                              | Distance to the nearest commercial place, including a supermarket, convenience, hairdresser, clothes, pharmacy, beverages, bakery, butcher, car dealership, department store, beauty shops, laundry, bicycle shops, gift shops, newsagent, furniture shop, greengrocer, jeweller, florist, outdoor shop, bookshop, shoe shop, sports shop, chemist, mobile phone shop, cinema, optician, computer shop toy shop, general, marketplace, mall, and video shop (measured by the ‘near’ function in ArcGIS Pro 2.8) |
| Distance to public service (m) <sup>B</sup>                          | Distance to the nearest public service, including a town hall, embassy, public building, post box, telephone, post office, police station, fire station, community centre, and library (measured by the ‘near’ function in ArcGIS Pro 2.8)                                                                                                                                                                                                                                                                      |
| Distance to roads (m) <sup>C</sup>                                   | Distance to the nearest road network (measured by the ‘near’ function in ArcGIS Pro 2.8)                                                                                                                                                                                                                                                                                                                                                                                                                        |
| Distance to healthcare (m) <sup>B</sup>                              | Distance to the nearest healthcare facility, including hospital, Doctors, dentist, nursing home (measured by the ‘near’ function in ArcGIS Pro 2.8)                                                                                                                                                                                                                                                                                                                                                             |
| Diversity of land use (index) <sup>D</sup>                           | The Simpson’s index for land-use diversity at the SA1 level, calculated as:<br>$LUD = 1 - \sum \frac{n_i^2}{N^2}$ , where $n_i$ =total number of areas in one SA1 for land use type $i$ ; $N$ = total area of all land use types, $i$ =types of land use classified into ten types, including commercial, education, hospital, industrial, parkland, primary production, residential, transport, water and other land use.<br>LUD score ranges from 0 (minimum diversity) to 1 (maximum diversity).             |
| Diversity of housing (index) <sup>A</sup>                            | The Simpson’s index for housing heterogeneity at SA1 level, calculated as:<br>$HD = 1 - \sum \frac{n_i^2}{N^2}$ , where $n_i$ =total number of a certain type of dwellings in that SA1 $i$ ; $N$ = total number of dwellings in that SA1, $i$ =types of dwellings classified into five types, including separated house, semi-separated (detached), flat, cabin, caravan. HD score ranges from 0 (minimum diversity) to 1 (maximum diversity).                                                                  |
| Density of buildings (m <sup>2</sup> /km <sup>2</sup> ) <sup>B</sup> | Building areas over the total area of a SA1                                                                                                                                                                                                                                                                                                                                                                                                                                                                     |



|                                                                 |                                                                                                                                                                         |
|-----------------------------------------------------------------|-------------------------------------------------------------------------------------------------------------------------------------------------------------------------|
| Density of roads and railways (m/km <sup>2</sup> ) <sup>C</sup> | Total length of roads and railways over the total area of a SA1                                                                                                         |
| Index of built-up areas <sup>E</sup>                            | The normalized difference built-up index ranging from -1 to 1; the higher positive values represent the bigger built-up areas in a SA1                                  |
| Street design (count per km <sup>2</sup> ) <sup>B</sup>         | Number of street facilities (e.g., benches, streetlamps, drinking water pumps) over the total area of a SA1                                                             |
| Connectivity design (count per km <sup>2</sup> ) <sup>B</sup>   | Number of traffic connectivity (e.g., crossing, roundabout, motorway junctions, slipway, stop signs, traffic signals, and turning circles) over the total area of a SA1 |

Note:

A Census of population and housing, Table Builder Portal (Australian Bureau of Statistics, 2016

<https://www.abs.gov.au/statistics/microdata-tablebuilder/tablebuilder>

B Open Street Map – Points of Interest (Australia), Australian Urban Research Infrastructure Network, 2020

<https://data.aurin.org.au/dataset/osm-osm-points-of-interest-2020-na>

C Digital cadastral database, Department for Infrastructure and Transport, Australian Government, 2020

<https://data.gov.au/dataset/ds-sa-4cc17ac3-ce49-4525-971b-6122023b8937/details>

D Land use data, Department of Agricultural, Water and the Environment, Australian Government, 2016

<https://www.awe.gov.au/abares/aclump/land-use/data-download>

E Sentinel-2 satellite imagery, Google Earth Engine, Google 2020

<https://developers.google.com/s/results/earth-engine/datasets?q=LANDSAT>

## Note 2 (Identified indicators for Theme 2 to 5)

In Theme 2 of demographics and disability (Fig 2), identified indicators for urban space include age above 65 ( $\alpha= 0.942$ ), median age ( $\alpha= 0.924$ ), not in labour force ( $\alpha= 0.806$ ) and needing assistance ( $\alpha= 0.706$ ). While there are additional indicators identified for rural space, including age 0-18, need child care, indigenous, multi-family households, and female composition. These indicators explain 4.125% and 8.281% of the variation for urban and rural areas, respectively (Supplementary Table S3 and S4). It is consistent with the literature concluding that two demographic groups are most affected by disasters, children and the elderly (Cutter, Mitchell et al. 2000, Cutter, Boruff et al. 2003, Martin, Bush et al. 2006, Cumberbatch, Drakes et al. 2020, Drakes, Tate et al. 2021; Peek-Asa, Ramirez et al. 2003, Rosenkoetter, Covan et al. 2007, Holand, Lujala et al. 2011). The preponderance of children (correspondingly households needing child care) and the elderly, together with populations not in labour force in the community load positively on this dimension. Indigenous population is only identified as the indicator for vulnerability in rural areas, possibly explained by the fact that regional and remote areas in Northern Territory and central Australia (e.g., culturally protected areas) inhabit a relatively larger number of indigenous and aboriginal populations compared to urban space.

In Theme 3 of minority and languages (Fig 2), indicators for measuring vulnerability in urban areas include non-English speaker ( $\alpha= 0.909$ ), minority ( $\alpha= 0.859$ ), and bad English ( $\alpha= 0.835$ ); while rural areas include indicators minority, bad English and ethnic diversity which are similar to indicators in urban areas. These indicators explain 3.575% and 2.177% of the variation for urban and rural areas, respectively (Supplementary Table S3 and S4). It is consistent with the literature that race and ethnicity have been observed to contribute to vulnerability (Cutter, Boruff et al. 2003, Burton and Cutter 2008, Schmidtlein, Deutsch et al. 2008, Holand, Lujala et al. 2011, Aksha, Juran et al. 2019; Cutter, Ash et al. 2014, Berke, Yu et al. 2019, Drakes, Tate et al. 2021; Solangaarachchi, Griffin et al. 2012, Wigtil, Hammer et al. 2016, Akinola, Adegoke et al. 2019), potentially due to the unequal access to resources, cultural differences, and the social, economic, and political marginalisation that is often associated with racial disparities.

In Theme 4 of housing characteristics (Fig 2), some common indicators identified in both urban and rural areas include households without cars ( $\alpha= 0.799$  for urban and 0.686 for rural), multi-unit houses ( $\alpha= 0.779$  and 0.746), households without internet ( $\alpha= 0.619$  and 0.809), and mobile living ( $\alpha= -0.782$  and 0.752). The indicator of renters ( $\alpha= 0.764$ ) contributes to vulnerability only in urban areas, possibly due to the fact that renters are more likely to live in urban areas with more available rental houses and easier access to jobs compared to rural areas. However, low mortgage ( $\alpha= 0.750$ ) and diversity of housing ( $\alpha= 0.643$ ) contribute to vulnerability only in rural areas where housing prices are relatively lower and more mixed land use are observed compared to urban areas with strict zoning systems. In addition, mobile living houses function differently in urban and rural areas. Urban areas with less mobile living houses ( $\alpha= -0.782$ ; i.e., caravan parks and manufactured houses) tend to be more vulnerable, possibly due to that such areas with houses less flexible to move would be subject to more loss of assets during natural hazards; while rural areas with more mobile living houses ( $\alpha= 0.752$ ) tend to be more vulnerable, possibly due to that mobile living facilities (e.g., camping sites, caravan parks, and movable cabins) are more common in rural space. These indicators explain 7.167% and 6.096% of the variation for urban and rural areas, respectively (Supplementary Table S3 and S4).

In Theme 5 of built environment (Fig 2), some common indicators are identified in both urban and rural areas, including the distance to commercial places ( $\alpha= 0.841$  for urban and 0.859 for rural), public service ( $\alpha= 0.728$  and 0.832), public transit ( $\alpha= 0.782$  and 0.676), and the nearest cities ( $\alpha= 0.796$  and 0.818), density of roads and railways ( $\alpha= 0.999$  and 0.974), connectivity

design ( $\alpha= 0.999$  and  $0.969$ ), and density of buildings ( $\alpha= 0.999$  and  $0.929$ ). It means that urban and rural areas with higher density of buildings, roads and railways, correspondingly more traffic connectivity (e.g., crossing, roundabout, motorway junctions, slipway, stop signs, traffic signals, and turning circles) tend to have higher levels of vulnerability. It is aligning with the literature concluding that the degree of development of the built environment is associated with the expected structural losses from hazard events (Burton and Cutter 2008, de Oliveira Mendes 2009, Krishnan, Ananthan et al. 2019; Cutter, Boruff et al. 2003, Holand, Lujala et al. 2011, Chen, Cutter et al. 2013; Cutter, Ash et al. 2014, Kirby, Reams et al. 2019, Cumberbatch, Drakes et al. 2020). Furthermore, urban and rural areas with longer distances to public facilities (e.g., commercial places, public transit and service) and the nearest city may present higher levels of vulnerability given people living there may be more difficulty to access social resources and support in face of natural disasters. Moreover, street design ( $\alpha= 0.886$ , e.g., the configuration of streetlamps and benches) contributes to vulnerability only in urban areas, possibly due to that the pedestrian-friendly neighbourhoods are more common in urban areas compared to more car-dependent environment in rural areas. These indicators explain 8.462% and 7.397% of the variation for urban and rural areas, respectively (Supplementary Table S3 and S4).

**Table S3.** Results of the principal component analysis and the loading factors of 11 principal components in urban areas

|                               | PC 1         | PC 2         | PC 3         | PC 4         | PC 5         | PC 6         | PC 7         | PC 8         | PC 9          | PC 10        | Communalities |
|-------------------------------|--------------|--------------|--------------|--------------|--------------|--------------|--------------|--------------|---------------|--------------|---------------|
| No car                        | <b>0.799</b> | -0.038       | 0.168        | -0.115       | 0.048        | 0.018        | 0.243        | 0.032        | 0.002         | -0.030       | 0.745         |
| Multi-unit houses             | <b>0.779</b> | -0.106       | 0.124        | -0.148       | -0.264       | 0.002        | 0.141        | -0.016       | 0.140         | -0.031       | 0.765         |
| Renters                       | <b>0.764</b> | -0.176       | 0.111        | -0.138       | 0.148        | 0.001        | 0.143        | 0.147        | 0.189         | -0.030       | 0.746         |
| Age above 65                  | 0.021        | <b>0.942</b> | -0.107       | 0.019        | -0.103       | -0.002       | 0.092        | -0.007       | -0.002        | 0.015        | 0.918         |
| Median age                    | 0.075        | <b>0.924</b> | -0.139       | 0.049        | -0.168       | -0.003       | 0.022        | -0.032       | -0.047        | 0.022        | 0.914         |
| Not labour force              | 0.110        | <b>0.806</b> | 0.193        | 0.012        | 0.274        | -0.001       | 0.061        | 0.021        | -0.054        | 0.002        | 0.781         |
| Need assistance               | 0.058        | <b>0.706</b> | 0.057        | -0.025       | 0.247        | -0.003       | 0.081        | 0.075        | 0.109         | 0.005        | 0.591         |
| Non-English speaker           | 0.159        | -0.081       | <b>0.909</b> | -0.159       | 0.120        | -0.002       | 0.014        | 0.001        | 0.021         | -0.036       | 0.899         |
| Minority                      | 0.238        | -0.046       | <b>0.859</b> | -0.172       | -0.027       | 0.002        | -0.064       | -0.099       | -0.028        | -0.024       | 0.843         |
| Bad English                   | 0.145        | 0.052        | <b>0.835</b> | -0.069       | 0.144        | -0.003       | 0.076        | 0.026        | 0.042         | -0.035       | 0.757         |
| Distance to commercial        | -0.138       | -0.019       | -0.104       | <b>0.841</b> | 0.032        | -0.001       | 0.010        | 0.079        | -0.015        | 0.020        | 0.745         |
| Distance to public transits   | -0.055       | 0.005        | -0.059       | <b>0.782</b> | 0.009        | -0.001       | 0.005        | 0.002        | 0.001         | 0.008        | 0.618         |
| Distance to public service    | -0.218       | -0.053       | -0.130       | <b>0.728</b> | 0.117        | -0.001       | 0.054        | -0.042       | -0.005        | 0.014        | 0.616         |
| Distance to healthcare        | -0.121       | 0.045        | -0.174       | <b>0.715</b> | 0.154        | -0.001       | 0.020        | -0.083       | -0.025        | -0.008       | 0.59          |
| Non-MPA occupation            | -0.129       | 0.010        | 0.081        | 0.148        | <b>0.859</b> | -0.001       | 0.080        | 0.058        | -0.015        | -0.018       | 0.794         |
| Low education                 | -0.274       | 0.272        | -0.123       | 0.191        | <b>0.761</b> | 0.001        | 0.071        | 0.086        | -0.050        | -0.005       | 0.795         |
| Connectivity design           | 0.010        | -0.003       | 0.001        | -0.001       | 0.001        | <b>0.999</b> | -0.001       | 0.001        | 0.001         | -0.002       | 0.999         |
| Density of buildings          | 0.010        | -0.003       | 0.001        | -0.002       | 0.001        | <b>0.999</b> | -0.001       | 0.001        | 0.001         | -0.002       | 0.999         |
| Density of roads and railways | 0.009        | -0.003       | 0.001        | -0.001       | 0.001        | <b>0.999</b> | -0.001       | -0.001       | 0.001         | -0.002       | 0.999         |
| Retired village               | 0.097        | 0.153        | -0.059       | 0.021        | -0.055       | 0.001        | <b>0.616</b> | -0.127       | -0.148        | -0.008       | 0.458         |
| Distance to cities            | -0.061       | 0.045        | -0.080       | 0.058        | 0.026        | 0.001        | -0.046       | <b>0.796</b> | -0.081        | 0.009        | 0.659         |
| Mobile living                 | -0.009       | 0.017        | -0.042       | -0.022       | 0.008        | 0.001        | 0.183        | 0.035        | <b>-0.782</b> | 0.027        | 0.649         |
| Street design                 | 0.001        | -0.035       | 0.033        | -0.029       | 0.018        | 0.003        | 0.110        | -0.038       | 0.087         | <b>0.886</b> | 0.809         |
| Rotated Squared Loadings      | 4.452        | 4.125        | 3.575        | 3.177        | 3.12         | 2.999        | 1.639        | 1.21         | 1.076         | 1.021        |               |
| % of Variance                 | 11.715       | 10.855       | 9.407        | 8.36         | 8.211        | 7.892        | 4.313        | 3.185        | 2.831         | 2.686        |               |
| Cumulative %                  | 11.715       | 22.57        | 31.977       | 40.337       | 48.547       | 56.439       | 60.752       | 63.937       | 66.767        | 69.454       |               |
| KMO of Sampling Adequacy      | 0.794        |              |              |              |              |              |              |              |               |              |               |
| Bartlett's Test of Sphericity | 1299179      |              |              |              |              |              |              |              |               |              |               |

Note: PC=principal components; KMO=Kaiser-Meyer-Olkin measures

Bold values indicate the loading factors of variables that significantly contribute to a certain PC

**Table S4.** Results of the principal component analysis and the loading factors of 11 principal components in rural areas

|                               | PC 1         | PC 2         | PC 3         | PC 4         | PC 5         | PC 6         | PC 7         | PC 8         | PC 9         | PC 10        | PC 11        | Communalities |
|-------------------------------|--------------|--------------|--------------|--------------|--------------|--------------|--------------|--------------|--------------|--------------|--------------|---------------|
| Median age                    | <b>0.932</b> | -0.042       | 0.001        | 0.015        | -0.029       | -0.027       | -0.109       | -0.162       | 0.082        | -0.004       | 0.024        | 0.918         |
| Age above 65                  | <b>0.918</b> | -0.072       | -0.002       | 0.067        | -0.027       | -0.021       | -0.063       | -0.102       | 0.214        | 0.02         | 0.002        | 0.914         |
| Not labour force              | <b>0.817</b> | -0.058       | 0.003        | 0.157        | 0.015        | 0.044        | 0.198        | 0.122        | 0.138        | 0.063        | -0.018       | 0.775         |
| Age 0-18                      | <b>0.798</b> | -0.008       | 0.003        | 0.039        | -0.192       | -0.131       | 0.054        | 0.188        | 0.22         | -0.006       | -0.051       | 0.781         |
| Need child care               | <b>0.699</b> | 0.01         | -0.008       | -0.05        | -0.239       | -0.066       | -0.109       | 0.047        | 0.351        | -0.148       | -0.029       | 0.712         |
| Distance to commercial        | -0.039       | <b>0.859</b> | 0.001        | 0.017        | -0.056       | -0.057       | -0.037       | 0.053        | -0.07        | 0.005        | 0.002        | 0.755         |
| Distance to public service    | -0.038       | <b>0.832</b> | 0.001        | -0.004       | -0.026       | -0.031       | -0.020       | 0.086        | -0.024       | 0.024        | -0.017       | 0.705         |
| Distance to cities            | -0.085       | <b>0.818</b> | -0.002       | -0.01        | -0.026       | -0.012       | -0.023       | 0.132        | 0.030        | -0.02        | 0.015        | 0.698         |
| Distance to public transits   | -0.046       | <b>0.676</b> | -0.001       | -0.009       | -0.005       | -0.099       | 0.018        | 0.223        | -0.018       | 0.225        | -0.043       | 0.572         |
| Density of roads and railways | 0.002        | 0.001        | <b>0.974</b> | -0.001       | -0.005       | -0.001       | -0.004       | -0.001       | 0.002        | -0.004       | -0.002       | 0.948         |
| Connectivity design           | 0.001        | -0.001       | <b>0.969</b> | -0.001       | -0.002       | 0.001        | -0.004       | -0.002       | 0.004        | -0.004       | -0.002       | 0.940         |
| Density of buildings          | -0.002       | -0.002       | <b>0.929</b> | -0.009       | 0.001        | 0.003        | 0.004        | 0.002        | -0.01        | 0.005        | -0.006       | 0.864         |
| No internet                   | 0.162        | 0.093        | -0.005       | <b>0.809</b> | 0.098        | -0.125       | 0.172        | 0.122        | -0.044       | 0.168        | 0.011        | 0.790         |
| Low mortgage                  | 0.22         | -0.113       | -0.009       | <b>0.75</b>  | -0.026       | -0.032       | 0.222        | -0.045       | 0.068        | -0.219       | 0.012        | 0.729         |
| No car                        | 0.017        | 0.098        | -0.002       | <b>0.686</b> | 0.389        | 0.07         | 0.050        | 0.352        | 0.028        | 0.115        | -0.019       | 0.778         |
| Multi-unit houses             | 0.001        | -0.078       | -0.002       | 0.229        | <b>0.746</b> | 0.247        | -0.088       | -0.178       | 0.080        | -0.007       | -0.059       | 0.725         |
| Diversity of housing          | 0.147        | -0.031       | -0.002       | -0.084       | <b>0.643</b> | 0.043        | 0.104        | 0.030        | 0.004        | 0.037        | 0.098        | 0.468         |
| Minority                      | 0.114        | -0.137       | 0.008        | -0.133       | 0.203        | <b>0.813</b> | -0.083       | -0.034       | -0.017       | -0.048       | 0.003        | 0.761         |
| Ethnic diversity              | 0.039        | -0.072       | 0.004        | -0.072       | 0.089        | <b>0.687</b> | -0.063       | -0.081       | 0.031        | -0.016       | -0.023       | 0.505         |
| Bad English                   | -0.002       | -0.091       | -0.007       | 0.161        | -0.031       | <b>0.668</b> | 0.154        | 0.093        | -0.093       | -0.005       | 0.023        | 0.523         |
| Non-MPA occupation            | 0.017        | -0.133       | 0.003        | 0.144        | -0.016       | -0.005       | <b>0.774</b> | -0.029       | -0.041       | 0.061        | -0.068       | 0.648         |
| Low education                 | 0.327        | 0.053        | -0.005       | 0.170        | -0.16        | -0.179       | <b>0.678</b> | -0.18        | 0.046        | -0.022       | -0.005       | 0.691         |
| Unemployed                    | -0.136       | 0.031        | 0.001        | 0.011        | 0.266        | 0.123        | <b>0.609</b> | 0.219        | 0.046        | -0.011       | 0.009        | 0.527         |
| Indigenous                    | -0.161       | 0.363        | -0.001       | 0.113        | 0.144        | -0.108       | 0.191        | <b>0.671</b> | 0.105        | 0.272        | -0.061       | 0.778         |
| Multi-family HH               | -0.066       | 0.126        | -0.002       | 0.219        | -0.148       | 0.070        | -0.087       | <b>0.638</b> | -0.042       | -0.229       | 0.058        | 0.567         |
| Female                        | 0.183        | -0.254       | -0.002       | 0.008        | 0.165        | -0.020       | 0.055        | 0.097        | <b>0.763</b> | -0.116       | 0.004        | 0.735         |
| Mobile living                 | 0.025        | 0.007        | -0.005       | -0.028       | -0.076       | -0.002       | 0.045        | 0.006        | -0.055       | <b>0.752</b> | 0.054        | 0.582         |
| Street design                 | -0.088       | 0.044        | 0.007        | -0.008       | 0.026        | 0.052        | 0.084        | -0.088       | 0.185        | 0.072        | <b>0.793</b> | 0.696         |
| Rotated Squared Loadings      | 4.743        | 3.604        | 2.753        | 2.426        | 2.283        | 2.177        | 2.087        | 2.005        | 1.533        | 1.387        | 1.04         |               |
| % of Variance                 | 12.482       | 9.483        | 7.244        | 6.385        | 6.007        | 5.73         | 5.492        | 5.277        | 4.033        | 3.65         | 2.738        |               |
| Cumulative %                  | 12.482       | 21.965       | 29.208       | 35.593       | 41.601       | 47.331       | 52.823       | 58.1         | 62.133       | 65.783       | 68.521       |               |
| KMO of Sampling Adequacy      | 0.797        |              |              |              |              |              |              |              |              |              |              |               |
| Bartlett's Test of Sphericity | 422744.8     |              |              |              |              |              |              |              |              |              |              |               |

Note: PC=principal components; KMO=Kaiser-Meyer-Olkin measures

Bold values indicate the loading factors of variables that significantly contribute to a certain PC

**Table S5.** Reclassification of 10 principal components of the vulnerability index in urban areas in five themes

| <b>Theme</b>                                    | <b>Principal component (PC)</b>                 | <b>Indicator</b>            | <b>Loadings</b> |
|-------------------------------------------------|-------------------------------------------------|-----------------------------|-----------------|
| <b>Theme 1: Socioeconomic status</b>            | PC 5 (Socioeconomic)                            | Non-MPA occupation          | 0.859           |
|                                                 |                                                 | Low education               | 0.761           |
| <b>Theme 2: Demographics &amp; disability</b>   | PC 2 (Demographic—Age)                          | Age above 65                | 0.942           |
|                                                 |                                                 | Median age                  | 0.924           |
|                                                 |                                                 | Not labour force            | 0.806           |
|                                                 |                                                 | Need assistance             | 0.706           |
| <b>Theme 3: Minority &amp; languages</b>        | PC 3 (Minority & language)                      | Non-English speaker         | 0.909           |
|                                                 |                                                 | Minority                    | 0.859           |
|                                                 |                                                 | Bad English                 | 0.835           |
| <b>Theme 4: Housing characteristics</b>         | PC 1 (Housing and transportation)               | No car                      | 0.799           |
|                                                 |                                                 | Multi-unit houses           | 0.779           |
|                                                 |                                                 | Renters                     | 0.764           |
|                                                 | PC 7 (Housing)                                  | No internet                 | 0.619           |
| PC 9 (Housing)                                  | Mobile living                                   | -0.782                      |                 |
| <b>Theme 5: Built environment</b>               | PC 4 (Built environment—Distance/accessibility) | Distance to commercial      | 0.841           |
|                                                 |                                                 | Distance to public transits | 0.782           |
|                                                 |                                                 | Distance to public service  | 0.728           |
|                                                 |                                                 | Distance to healthcare      | 0.715           |
|                                                 | PC 6 (Built environment—Density and design)     | Connectivity design         | 0.999           |
|                                                 |                                                 | Density of buildings        | 0.999           |
| PC 8 (Built environment—Distance/accessibility) | Density of roads and railways                   | 0.999                       |                 |
|                                                 | Distance to cities                              | 0.796                       |                 |
| PC 10 (Built environment—Design)                | Street design                                   | 0.886                       |                 |

**Table S6.** Reclassification of 11 principal components of the vulnerability index in rural areas in five themes

| <b>Theme</b>                                  | <b>Principal component (PC)</b>                 | <b>Indicator</b>              | <b>Loadings</b> |
|-----------------------------------------------|-------------------------------------------------|-------------------------------|-----------------|
| <b>Theme 1: Socioeconomic status</b>          | PC 7 (Socioeconomic)                            | Non-MPA occupation            | 0.774           |
|                                               |                                                 | Low education                 | 0.678           |
|                                               |                                                 | Unemployed                    | 0.609           |
| <b>Theme 2: Demographics &amp; disability</b> | PC 1 (Demographic—Age)                          | Median age                    | 0.932           |
|                                               |                                                 | Age above 65                  | 0.918           |
|                                               |                                                 | Not labour force              | 0.817           |
|                                               |                                                 | Age 0-18                      | 0.798           |
|                                               |                                                 | Need child care               | 0.699           |
|                                               | PC 8 (Demographic)                              | Indigenous                    | 0.671           |
|                                               | Multi-family HH                                 | 0.638                         |                 |
|                                               | PC 9 (Demographic)                              | Female                        | 0.763           |
| <b>Theme 3: Minority &amp; languages</b>      | PC 6 (Minority & language)                      | Minority                      | 0.813           |
|                                               |                                                 | Ethnic diversity              | 0.687           |
|                                               |                                                 | Bad English                   | 0.668           |
| <b>Theme 4: Housing characteristics</b>       | PC 4 (Housing and transportation)               | No internet                   | 0.809           |
|                                               |                                                 | Low mortgage                  | 0.75            |
|                                               |                                                 | No car                        | 0.686           |
|                                               | PC 5 (Housing)                                  | Multi-unit houses             | 0.746           |
|                                               |                                                 | Diversity of housing          | 0.643           |
|                                               | PC 10 (Housing)                                 | Mobile living                 | 0.752           |
| <b>Theme 5: Built environment</b>             | PC 2 (Built environment—Distance/accessibility) | Distance to commercial        | 0.859           |
|                                               |                                                 | Distance to public service    | 0.832           |
|                                               |                                                 | Distance to cities            | 0.818           |
|                                               |                                                 | Distance to public transits   | 0.676           |
|                                               | PC 3 (Built environment—Density and design)     | Density of roads and railways | 0.974           |
|                                               |                                                 | Connectivity design           | 0.969           |
|                                               |                                                 | Density of buildings          | 0.929           |
| PC 11 (Built environment—Design)              | Street design                                   | 0.793                         |                 |

### **Note 3 (Details of the most vulnerable areas in capital cities)**

For Theme 1 (Supplementary Fig S2), the most vulnerable areas in terms of socioeconomic status appear in the west (e.g., Windsor - Bligh Park, St Marys - North St Marys), the southwest (e.g., Ashcroft - Busby - Miller, Bonnyrigg Heights - Bonnyrigg), and the south of Sydney (e.g., Campbelltown - Woodbine, Bradbury - Wedderburn); in the north (e.g., Burwood) and southeast Melbourne (e.g., Clayton, Doveton, Cranbourne); in the south and southwest of Brisbane (e.g., Logan, Springwood - Kingston, Beenleigh, Inala - Richlands, Ipswich); in the northeast (e.g., Elizabeth, Paralowie) and the south (e.g., Hackham West, Huntfield Heights) of Adelaide; in the south and northeast of Perth (e.g., Mandurah, Canning Vale - East, Bentley - Wilson - St James, Midland - Guildford); in the western bay of Hobart (e.g., Moonah, Glenorchy) and the eastern bay of Hobart (e.g., Bridgewater - Gagebrook, Risdon Vale, Mornington - Warrane); in the urban fringe of Darwin (e.g., Howard Springs, Berrimah); and in several small suburbs in Australian Capital Territory (e.g., Canberra East, Acton, Bruce).

For Theme 2 (Supplementary Fig S3), the most vulnerable areas in terms of demographics and disability have less obvious patterns that can be generalised but more spread out sporadically across entire urban space outside of inner cities in Sydney, Brisbane, Adelaide, Perth, and ACT. The concentrations of such vulnerable areas are more obvious to see in the southeast coast of Melbourne (e.g., Flinders, Mornington, Mount Martha, Dromana, Point Nepean), in the west of Hobart (e.g., Taroona - Bonnet Hill, New Town, Glenorchy, Claremont) and in Darwin (e.g., Lyons).

For Theme 3 (Supplementary Fig S4), the most vulnerable areas in terms of minority and languages appear in the west and south of Sydney (e.g., Liverpool, Blacktown); in the southwest of Melbourne (e.g., Springvale, Dandenong), the north (e.g., Thomastown, Campbellfield - Coolaroo, Roxburgh Park - Somerton, Craigieburn) and the west of Melbourne (e.g., Thomastown, Campbellfield - Coolaroo, Roxburgh Park - Somerton, Craigieburn); in the south and southwest of Brisbane (e.g., Sunnybank, Sunnybank Hills, Calamvale - Stretton); in Adelaide (e.g., Parafield), Perth (e.g., Jandakot) and Darwin (e.g., Humpty Doo).

For Theme 4 (Supplementary Fig S5), the most vulnerable areas in terms of housing characteristics appear in a few suburbs in Sydney (e.g., Bilpin - Colo - St Albans); in the northwest of Melbourne (e.g., Sunbury - South, Gisborne); in the northwest of Brisbane (e.g., Esk in Ipswich Hinterland) and the south of Brisbane (e.g., Boonah and Beaudesert); in the north corner of Adelaide (e.g., Virginia - Waterloo) and the east of Adelaide (e.g., Mount Barker); in the north of Perth (e.g., Tapping - Ashby - Sinagra) and in the south of Perth (e.g., Mandurah - North, Halls Head - Erskine, Pinjarra); in Hobart (e.g., Bridgewater - Gagebrook, Glenorchy, South Hobart - Fern Tree, Sorell - Richmond); in Darwin (e.g., Weddell); in the southwest of ACT (e.g., Aranda, Ainslie, Campbell, Calwell).

For Theme 5 (Supplementary Fig S6), the most vulnerable areas in terms of built environment in capital cities share some common patterns — largely appearing close to and/or on the urban fringe, far away from the inner cities.



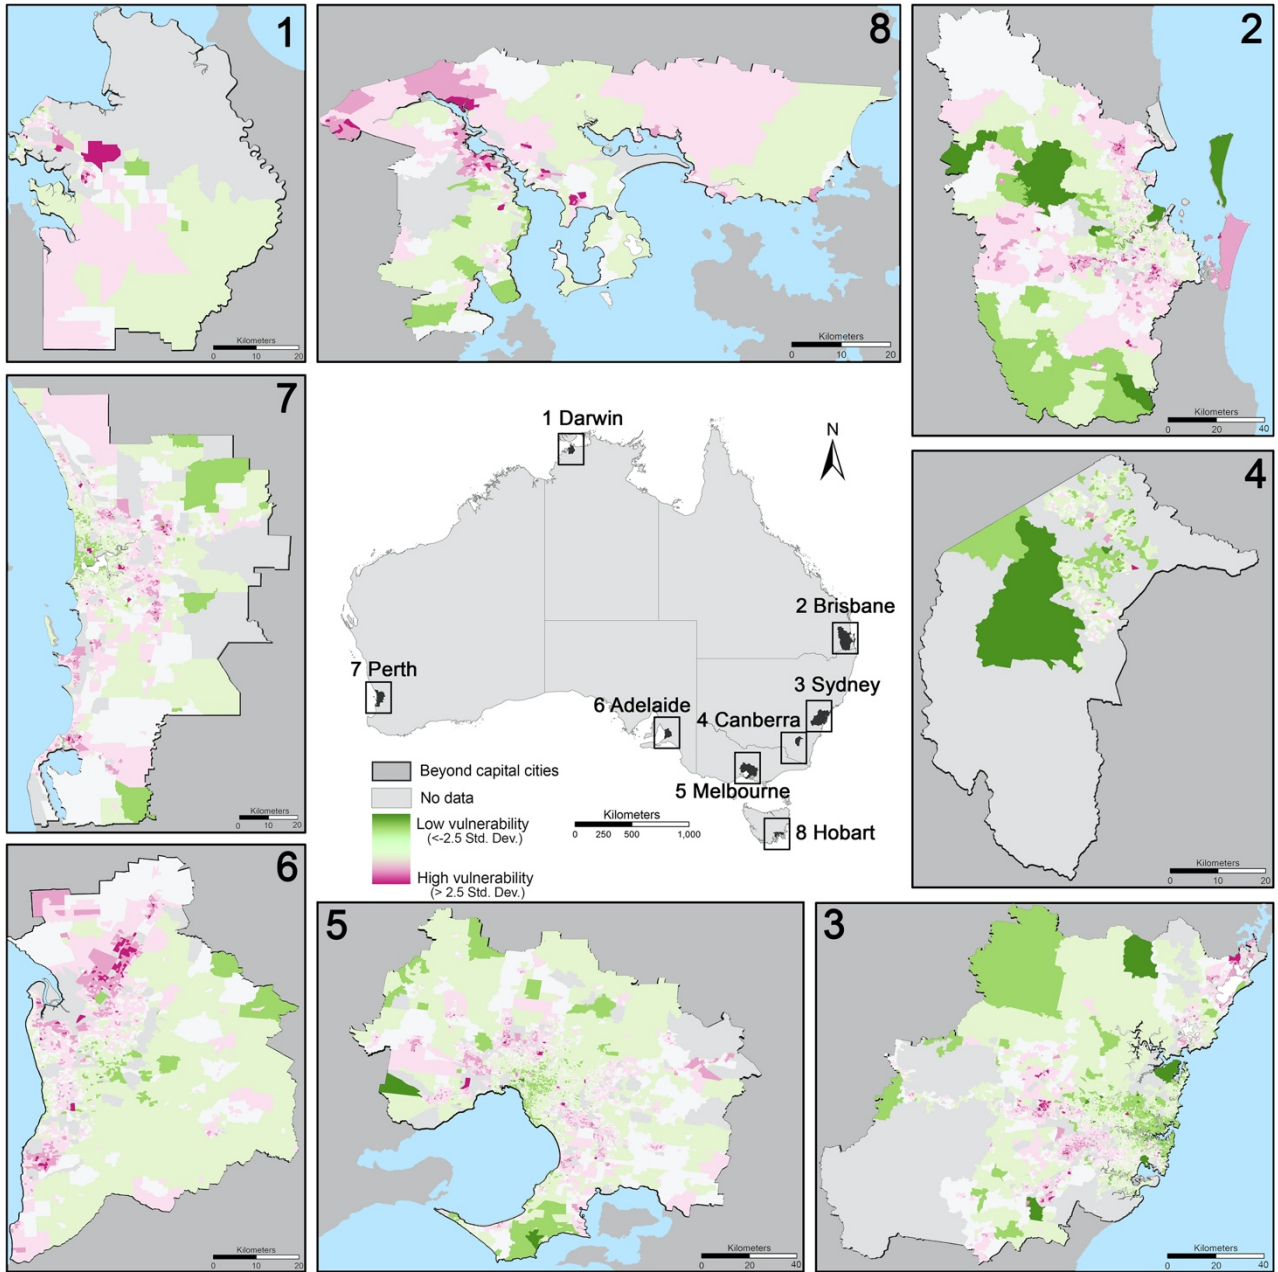

**Figure S2.** Spatial patterns of the vulnerability index in Theme 1 (socioeconomic status) in urban areas of eight capital cities

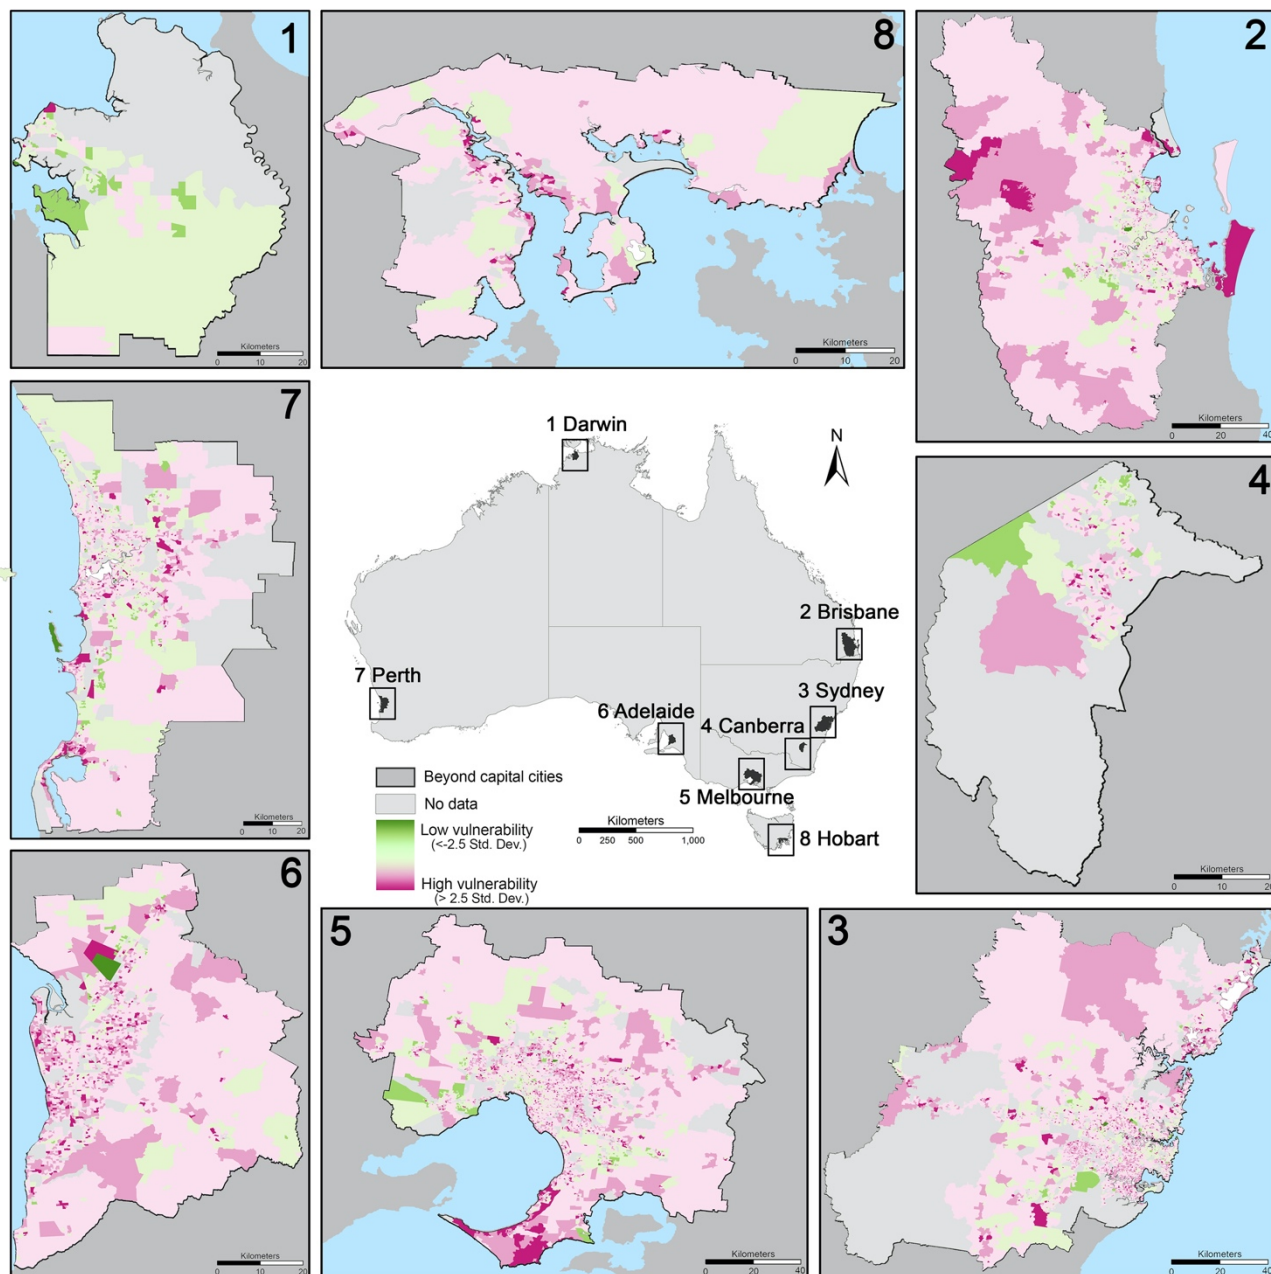

**Figure S3.** Spatial patterns of the vulnerability index in Theme 2 (demographics & disability) in urban areas of eight capital cities

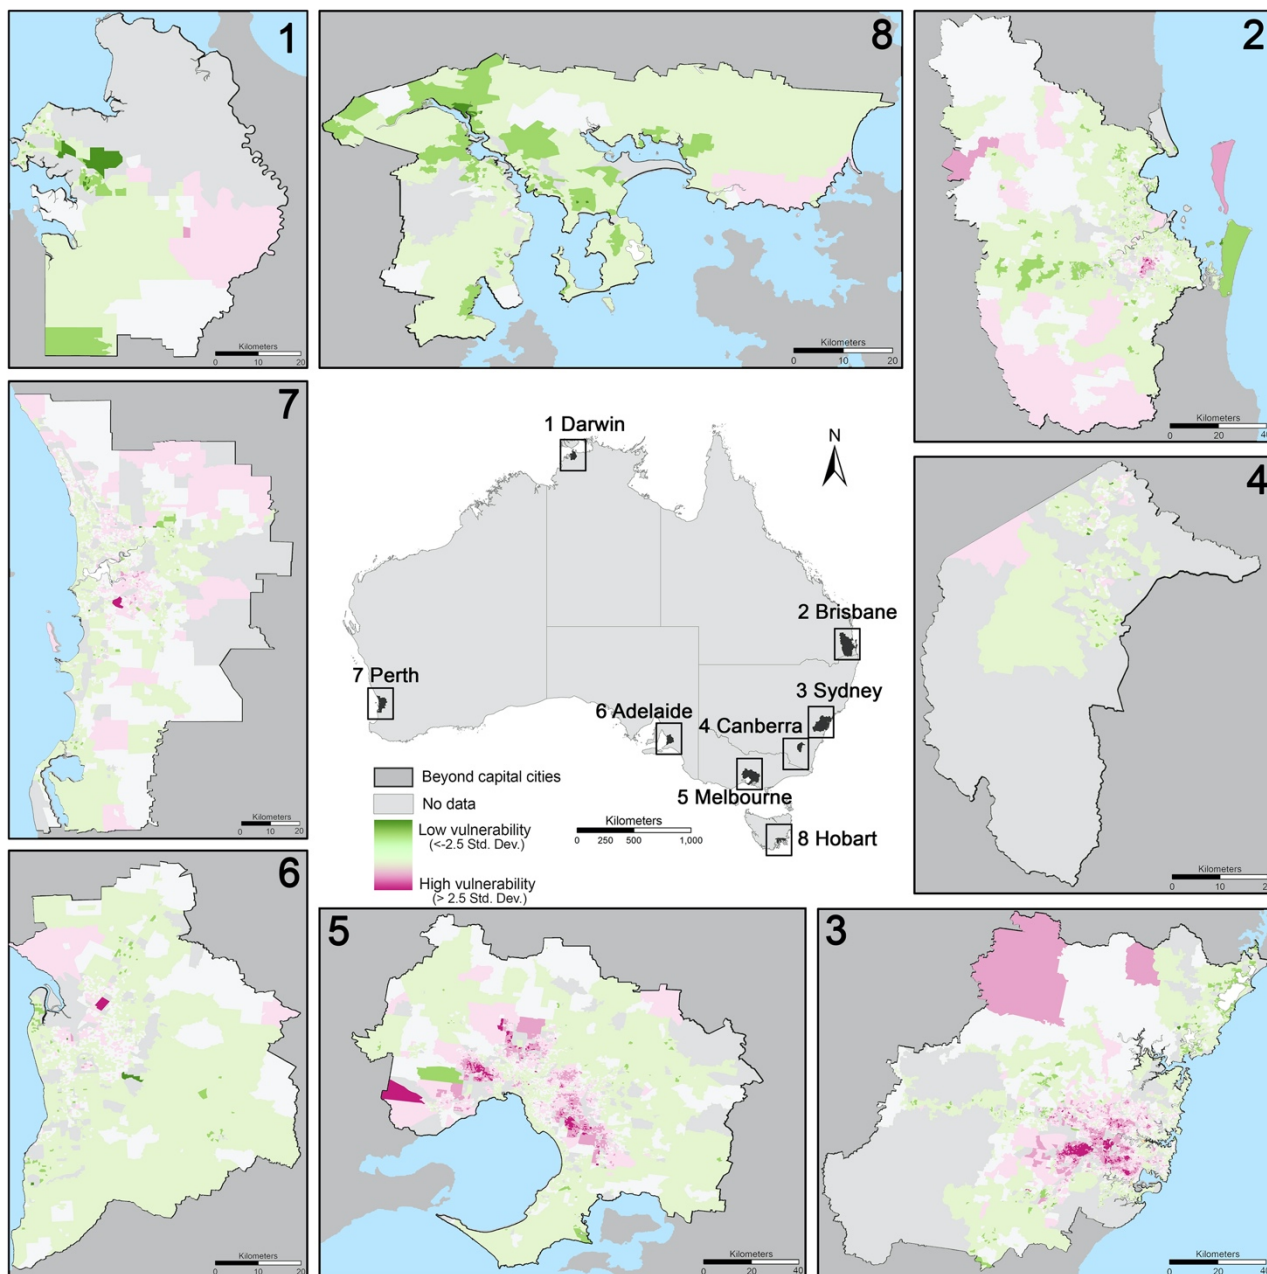

**Figure S4.** Spatial patterns of the vulnerability index in Theme 3 (minority & languages) in urban areas of eight capital cities

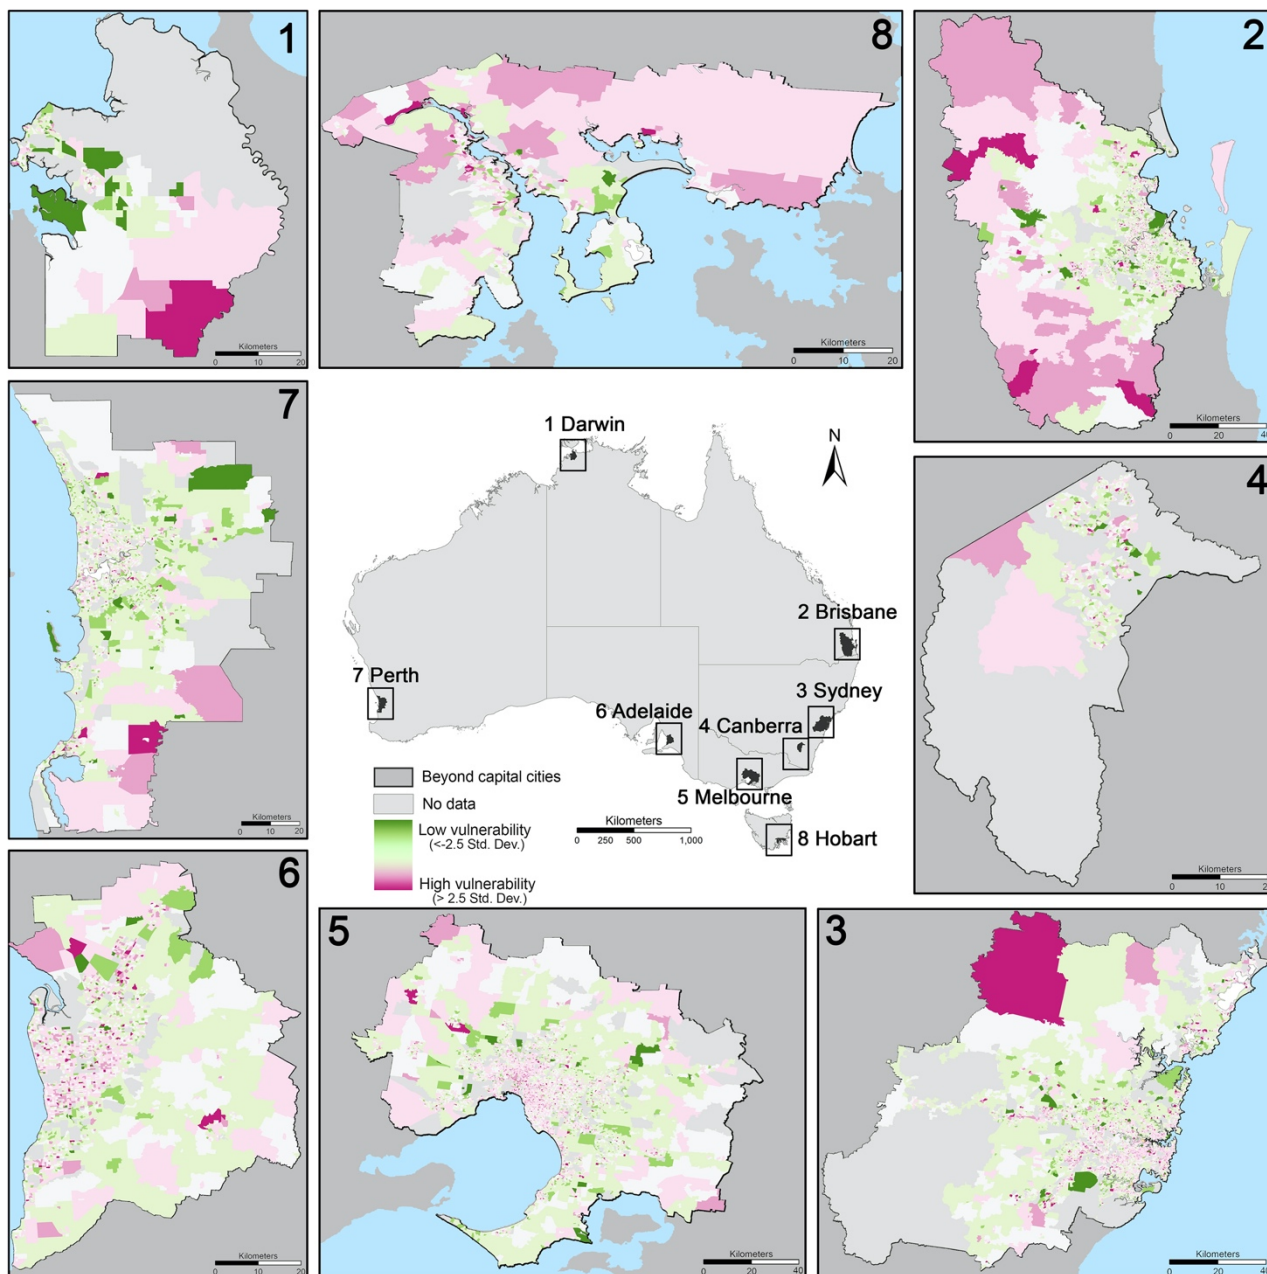

**Figure S5.** Spatial patterns of the vulnerability index in Theme 4 (housing characteristics) in urban areas of eight capital cities

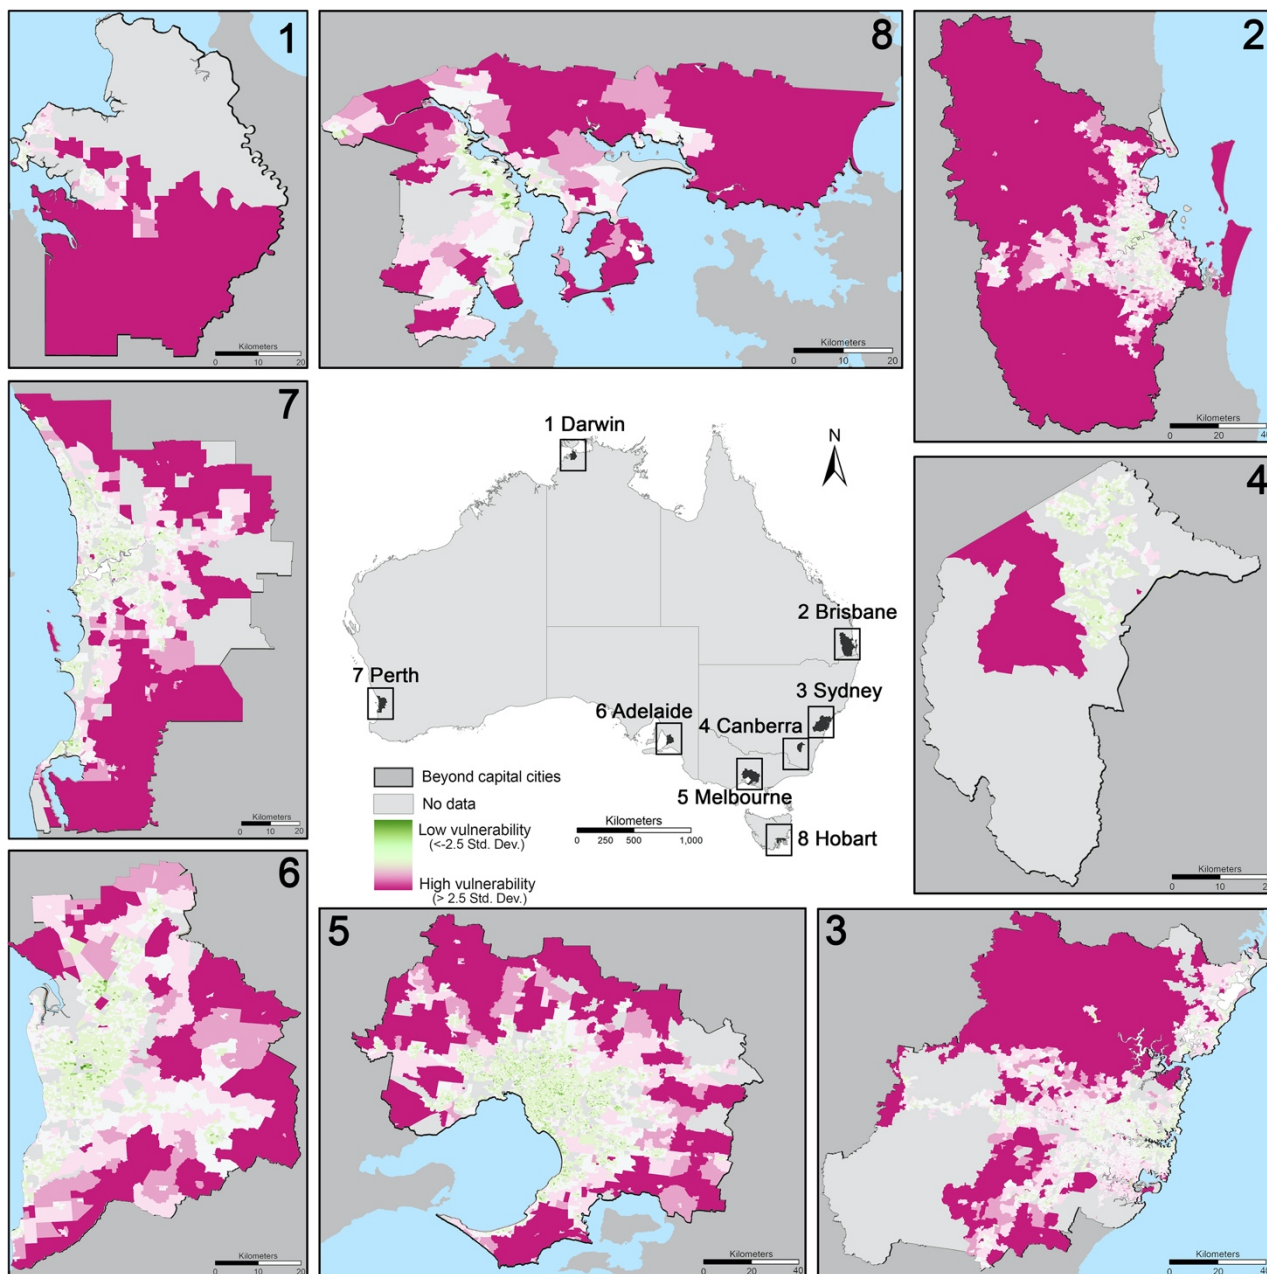

**Figure S6.** Spatial patterns of the vulnerability index in Theme 5 (built environment) in urban areas of eight capital cities

**Table S7.** The most vulnerable areas in rural and urban areas in different themes

|         | <b>Rural areas</b>                                                                                                                                                                                                                      | <b>Urban areas</b>                                                                                                                                                                                                                                                                                                                                                                                                                                                                                                                                                                                                                                                                                                                                                                                                                                                                                                                                                                                                                                                                               |
|---------|-----------------------------------------------------------------------------------------------------------------------------------------------------------------------------------------------------------------------------------------|--------------------------------------------------------------------------------------------------------------------------------------------------------------------------------------------------------------------------------------------------------------------------------------------------------------------------------------------------------------------------------------------------------------------------------------------------------------------------------------------------------------------------------------------------------------------------------------------------------------------------------------------------------------------------------------------------------------------------------------------------------------------------------------------------------------------------------------------------------------------------------------------------------------------------------------------------------------------------------------------------------------------------------------------------------------------------------------------------|
| Overall | <p>West Australia: Exmouth, Leinster, Meekatharra, East Pilbara, Roebuck, Kimberley, Kununurra</p> <p>Northern Territory: Alice Springs, Barkly, Katherine, Daly-Tiwi West Arnhem (south of Darwin)</p> <p>South Australia: Outback</p> | <p>Sydney: North (Bilpin - Colo - St Albans); Southwest: (The Oaks – Oakdale, Rosemeadow - Glen Alpine, Cobbitty – Leppington, Austral – Greendale, Bradbury – Wedderburn)</p> <p>Melbourne: Wyndham Vale, Melton, Romsey, Wallan, Koo Wee Rup</p> <p>Brisbane: Logan, Loganlea, Springwood – Kingston, Beenleigh, Inala – Richlands, Ipswich – Central</p> <p>Adelaide: Virginia - Waterloo Corner, Adelaide Hills, Mount Barker Region</p> <p>Perth: North (Carabooda – Pinjar, Bullsbrook, Chidlow, Gidgegannup); East (Lesmurdie - Bickley – Carmel, Serpentine – Jarrahdale); South (Pinjarra, Dawesville – Bouvard)</p> <p>Hobart: Bridgewater – Gagebrook, New Norfolk, Brighton – Pontville, Sorell – Richmond, Risdon Vale, Dodges Ferry – Lewisham</p> <p>Darwin: South (Weddell, Howard Springs)</p> <p>ACT: ACT - South West, Page</p>                                                                                                                                                                                                                                               |
| Theme 1 | <p>West Australia: Exmouth, Leinster, Meekatharra, East Pilbara, Roebuck, Kimberley, Kununurra</p> <p>Northern Territory: Alice Springs, Barkly, Katherine, Daly-Tiwi West Arnhem (south of Darwin)</p> <p>South Australia: Outback</p> | <p>Sydney: West (Windsor - Bligh Park, Lethbridge Park – Tregear, St Marys - North St Marys, Doonside – Woodcroft); Southwest (Ashcroft - Busby – Miller, Bonnyrigg Heights – Bonnyrigg, Macquarie Fields – Glenfield); South (Claymore - Eagle Vale – Raby, Campbelltown – Woodbine, Bradbury – Wedderburn)</p> <p>Melbourne: Laverton, Broadmeadows, Campbellfield – Coolaroo, Kingsbury, Bundoora – North, Burwood, Southeast (Clayton, Doveton, Cranbourne, Frankston North, Seaford)</p> <p>Brisbane: Logan, Loganlea, Springwood – Kingston, Beenleigh, Inala – Richlands, Ipswich – Central</p> <p>Adelaide: Northeast (Elizabeth, Paralowie, Enfield - Blair Athol); South (Hackham West - Huntfield Heights, Christie Downs)</p> <p>Perth: South (Mandurah), Canning Vale – East, Bentley - Wilson - St James, Midland – Guildford</p> <p>Hobart: West bay (Moonah, Glenorchy, Mount Nelson – Dynnryne); East bay (Bridgewater – Gagebrook, Risdon Vale, Mornington – Warrane, Hobart - North East)</p> <p>Darwin: Howard Springs, Berrimah</p> <p>ACT: Canberra East, Acton, Bruce</p> |
| Theme 2 | <p>West Australia: Derby-West Kimberley</p> <p>Northern Territory: North (West Arnhem, Barkey, Yuendumu Anmatjere)</p>                                                                                                                  | <p>Sydney, Brisbane, Adelaide: more sporadically spread out in suburbs rather than inner city</p> <p>Melbourne: Southeast coast (Flinders, Mornington, Mount Martha, Dromana, Point Nepean)</p> <p>Perth: spreading out</p> <p>Hobart: West (Taroona - Bonnet Hill, New Town, Glenorchy, Claremont); East: Bellerive – Rosny, Mornington – Warrane,</p> <p>Darwin: Lyons</p> <p>ACT: spreading out</p>                                                                                                                                                                                                                                                                                                                                                                                                                                                                                                                                                                                                                                                                                           |

|         |                                                                                                                                                                                                                    |                                                                                                                                                                                                                                                                                                                                                                                                                                                                                                                                                                                       |
|---------|--------------------------------------------------------------------------------------------------------------------------------------------------------------------------------------------------------------------|---------------------------------------------------------------------------------------------------------------------------------------------------------------------------------------------------------------------------------------------------------------------------------------------------------------------------------------------------------------------------------------------------------------------------------------------------------------------------------------------------------------------------------------------------------------------------------------|
| Theme 3 | West Australia: Midwest (Meekatharra, East Pilbara)                                                                                                                                                                | Sydney: Liverpool, Blacktown<br>Melbourne: Southwest; Springvale, Dandenong; North (Thomastown, Campbellfield – Coolaroo, Roxburgh Park – Somerton, Craigieburn); West: Sunshine North, Braybrook, St Albans – South, Kings Park, Wyndham Vale<br>Brisbane: Ipswich Hinterland, Sunnybank, Sunnybank Hills, Calamvale – Stretton<br>Adelaide: Parafield<br>Perth: Jandakot<br>Darwin: Humpty Doo                                                                                                                                                                                      |
| Theme 4 | West Australia: (East Pilbara, Halls Creek Derby-West Kimberley, Hall Creek)<br>Northern Territory: Tanami, Sandover-Plenty, Barkly, Daly<br>South Australia: West Coast, outback<br>Queensland: Central highlands | Sydney: Bilpin - Colo - St Albans<br>Melbourne: Northwest: Sunbury – South, Gisborne<br>Brisbane: Northwest (Esk in Ipswich Hinterland); South: Boonah and Beaudesert<br>Adelaide: more sporadically spread out in suburbs plus Virginia - Waterloo Corner in the north and Mount Barker in the east<br>Perth: North (Tapping - Ashby – Sinagra); South (Mandurah – North, Halls Head – Erskine, Pinjarra)<br>Hobart: Bridgewater – Gagebrook, Glenorchy, South Hobart - Fern Tree, Sorell – Richmond<br>Darwin: Weddell<br>ACT: ACT - South West, Aranda, Ainslie, Campbell, Calwell |
| Theme 5 | West Australia: Roebuck (coastal), East Pilbara, Meekatharra, Exmouth, Kambalda, Coolgardie<br>Northern Territory: Tanami, Sandover – plenty<br>Queensland: Far central west                                       | Sydney, Melbourne, Brisbane, Perth: Areas on the urban fringe and outer rings of urban space<br>Adelaide: Adelaide Hills, Mount Barker Region, Hahndorf – Echunga, Clarendon<br>ACT: ACT - South West                                                                                                                                                                                                                                                                                                                                                                                 |

Note: Theme 1: socioeconomic status; Theme 2: demographic composition & disability; Theme 3: minority status & language; Theme 4: housing type & transportation; Theme 5: built environment

**Table S8.** Statistic summary of the vulnerability index in urban and rural areas

|          | New South Wales |         | Victoria |        | Queensland |         | South Australia |         | West Australia |         | Tasmania |        | North Territory |        | Australian Capital Territory |
|----------|-----------------|---------|----------|--------|------------|---------|-----------------|---------|----------------|---------|----------|--------|-----------------|--------|------------------------------|
|          | Urban           | Rural   | Urban    | Rural  | Urban      | Rural   | Urban           | Rural   | Urban          | Rural   | Urban    | Rural  | Urban           | Rural  | Urban                        |
| Mean     | 0.897           | -0.033  | -0.491   | -0.397 | 0.102      | -0.152  | 0.122           | 0.186   | -0.851         | 0.452   | 0.756    | -0.171 | -0.624          | 7.041  | -2.446                       |
| Std. Dev | 3.013           | 3.076   | 2.410    | 2.382  | 3.082      | 2.879   | 2.463           | 2.813   | 2.290          | 4.318   | 3.211    | 1.959  | 4.019           | 7.467  | 2.173                        |
| Min      | -14.038         | -10.805 | -15.260  | -9.885 | -20.273    | -10.702 | -30.417         | -21.987 | -16.372        | -12.823 | -11.488  | -5.248 | -18.063         | -4.836 | -19.224                      |
| Max      | 33.238          | 59.575  | 51.240   | 17.118 | 33.962     | 69.094  | 12.997          | 23.522  | 15.114         | 48.496  | 16.513   | 13.223 | 19.465          | 25.328 | 11.572                       |
| Number   | 10741           | 6911    | 9980     | 3674   | 5179       | 5943    | 3039            | 1036    | 4306           | 1411    | 562      | 815    | 308             | 254    | 1026                         |

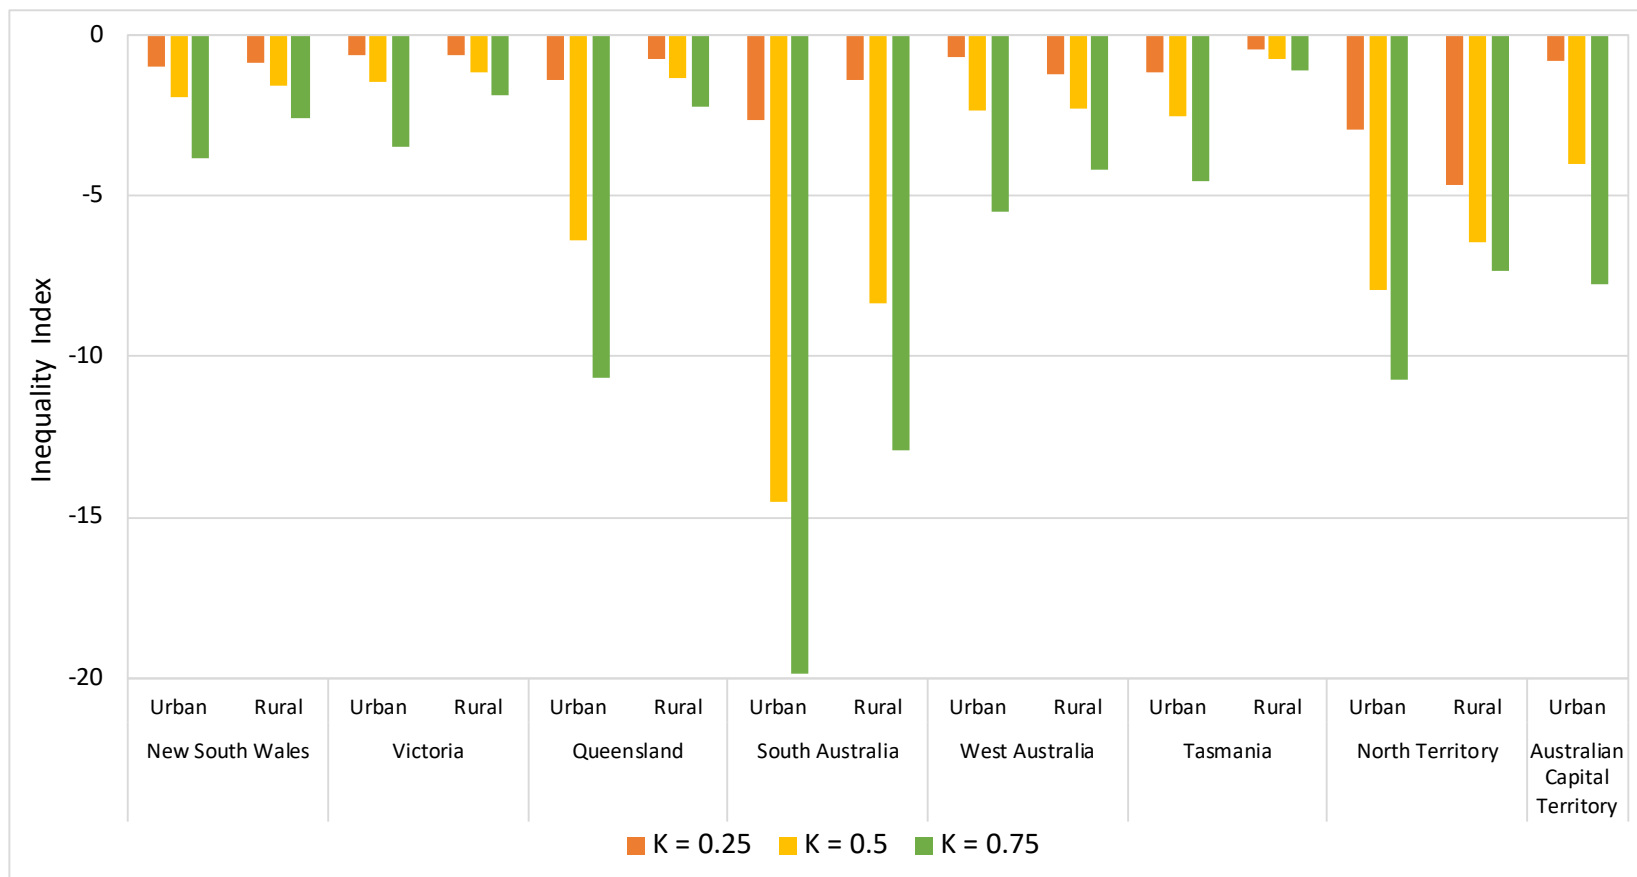

**Figure S7.** Inequality index of vulnerability in urban and rural areas with different settings of K values (see Methods and Supplementary Table S8). The increase of K values from 0.25 to 0.75 is associated with the increasing magnitude of the inequality index (Supplementary Table S8).

**Table S9.** Inequity of the vulnerability index in urban and rural areas

|          | New South Wales |        | Victoria |        | Queensland |        | South Australia |         | Western Australia |        | Tasmania |        | Northern Territory |        | Australian Capital Territory |
|----------|-----------------|--------|----------|--------|------------|--------|-----------------|---------|-------------------|--------|----------|--------|--------------------|--------|------------------------------|
|          | Urban           | Rural  | Urban    | Rural  | Urban      | Rural  | Urban           | Rural   | Urban             | Rural  | Urban    | Rural  | Urban              | Rural  | Urban                        |
| $k=0.25$ | -0.968          | -0.865 | -0.639   | -0.619 | -1.419     | -0.720 | -2.620          | -1.421  | -0.677            | -1.229 | -1.139   | -0.417 | -2.950             | -4.667 | -0.795                       |
| $k=0.5$  | -1.947          | -1.601 | -1.435   | -1.179 | -6.397     | -1.342 | -14.519         | -8.346  | -2.330            | -2.278 | -2.544   | -0.764 | -7.903             | -6.415 | -3.989                       |
| $k=0.75$ | -3.825          | -2.565 | -3.449   | -1.846 | -10.673    | -2.220 | -19.848         | -12.916 | -5.491            | -4.208 | -4.543   | -1.071 | -10.727            | -7.317 | -7.772                       |



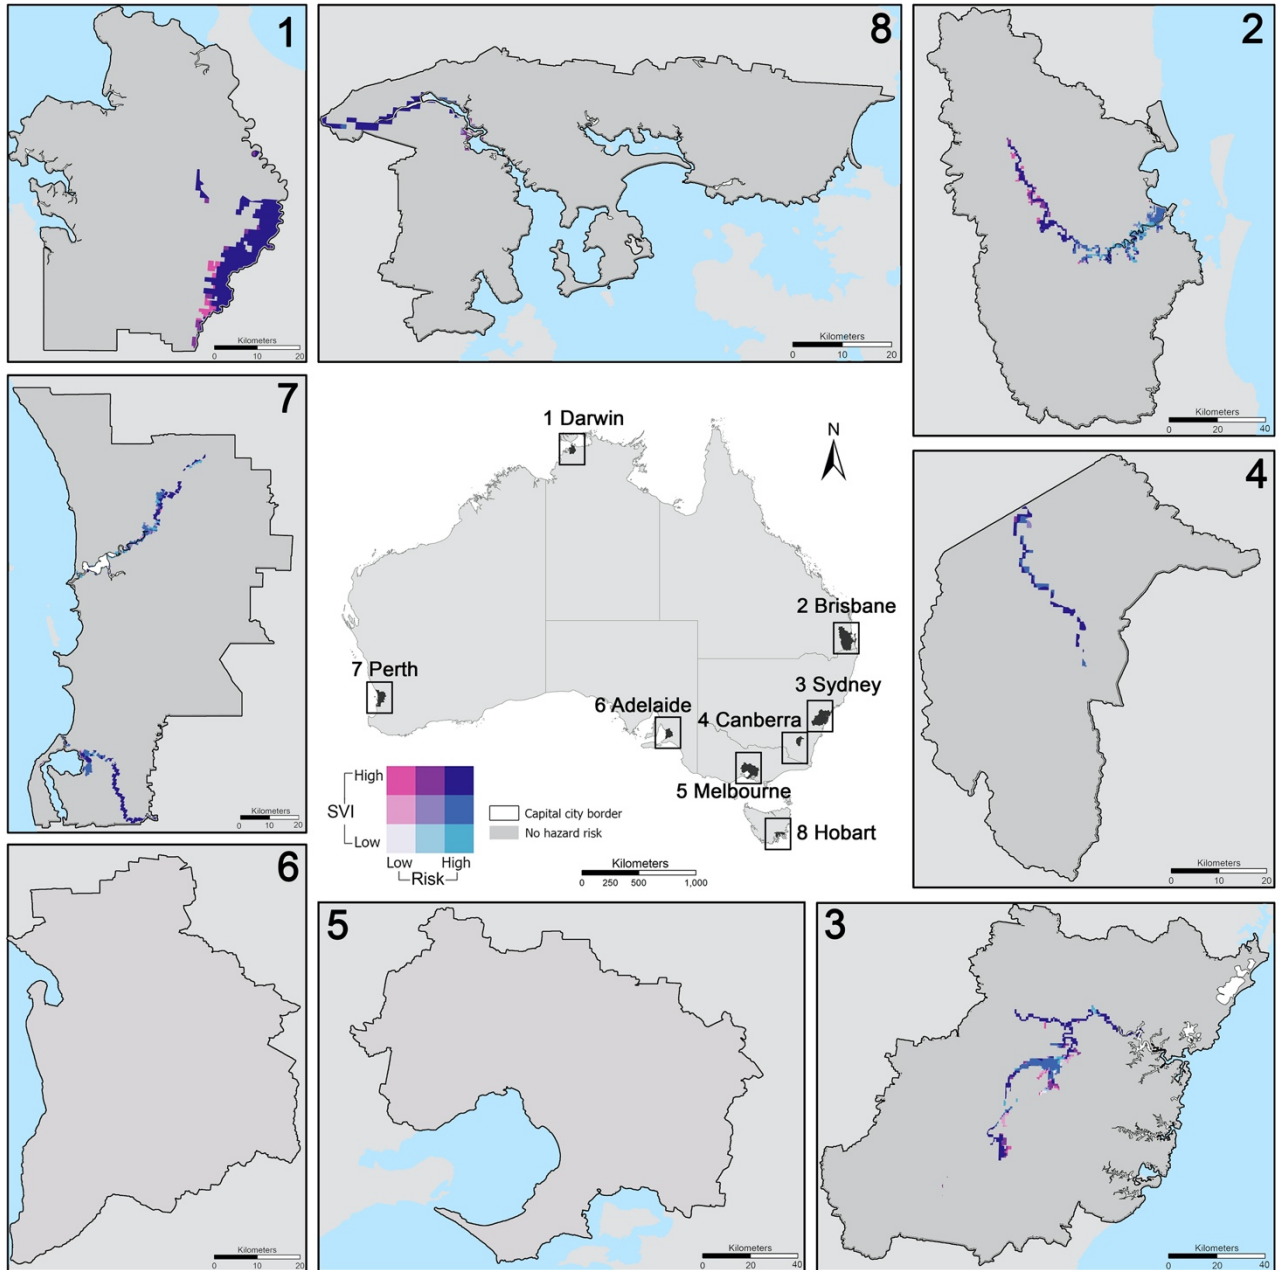

**Figure S8.** Enlarged capital city maps of the most vulnerable areas highly risky in flood.

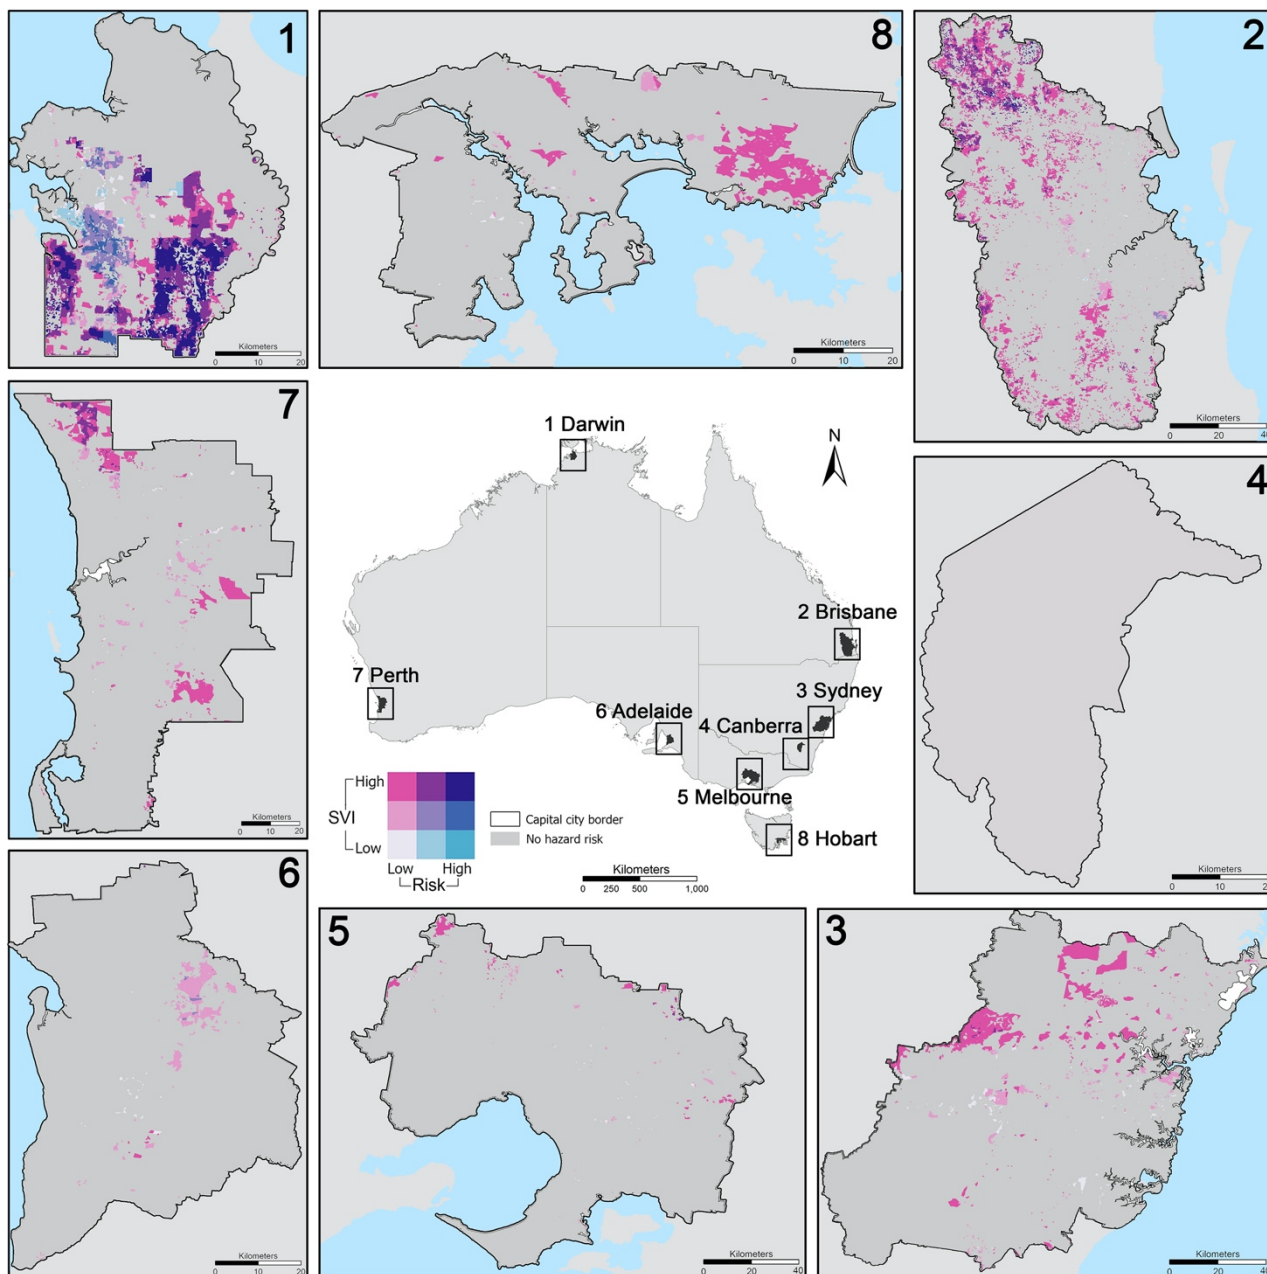

**Figure S9.** Enlarged capital city maps of the most vulnerable areas highly risky in wildfire. ACT has no hazard-affected areas.

**Note 4 (Details of the most vulnerable and highly risky areas in eight capital cities)**

We enlarge the maps of capital cities to see more detailed locations of the vulnerable areas highly risky in wildfire and flood (Supplementary Fig S8 and S9). The most vulnerable areas highly risky in flood appear along the hydrological network in capital cities except Adelaide and Melbourne) — along the Brisbane River towards Lake Wivenhoe in Brisbane, along the Parramatta River linking to Lake Burrigorang and the outbound ocean harbour in Sydney, along the Murrumbidgee River and Tumut River linking to Eucumbene Dam in ACT, along the Swan River bringing the ocean water toward inland in Perth, along the Adelaide River on the southeast edge of Darwin and along the River Derwent bringing the ocean water to Meadowbank Dam and Meadowbank Lake (Supplementary Table S9).

The most vulnerable areas highly risky in wildfire appear predominantly in the middle and south of Darwin and the north of Brisbane as the capital city of Northern Territory and Queensland — two tropical states in Australia (Supplementary Table S9). The highly vulnerable areas also sporadically appear in the north and northwest of Sydney (e.g., Baulkham Hills and Hawkesbury, Outer West and Blue Mountains), the north and west edge of Melbourne (e.g., Macedon Ranges, Nillumbik – Kinglake), the east of Hobart (Sorell - Dodges Ferry), the northeast of Adelaide (e.g., One Tree Hill, Adelaide Hills) and the north, east and southeast of Perth (e.g., Carabooda – Pinjar, Lesmurdie - Bickley – Carmel, Serpentine - Jarrahdale).

**Table S10.** The most vulnerable areas highly risky in natural hazards

|            | <b>Rural areas</b>                                                                                                                                                                                                     | <b>Urban areas</b>                                                                                                                                                                                                                                                                                                                                                                                                                                                    |
|------------|------------------------------------------------------------------------------------------------------------------------------------------------------------------------------------------------------------------------|-----------------------------------------------------------------------------------------------------------------------------------------------------------------------------------------------------------------------------------------------------------------------------------------------------------------------------------------------------------------------------------------------------------------------------------------------------------------------|
| Earthquake | West Australia: Northwest coast (Exmouth, Roebuck, Midwest: East Pilbara Kununurra (border to Northern Territory) Kambalda South Australia: Outback Victoria: Wellington, Yarram, Foster, areas along Western Port Bay | ACT: southwest<br>Melbourne: south coastal areas along the Western Port Bay<br>Adelaide: the major areas in the middle and south                                                                                                                                                                                                                                                                                                                                      |
| Wildfire   | West Australia: Derby Northern Territory: West Arnhem, Kakadu National Park, Daly River Queensland: North peninsula (Cape York)                                                                                        | Brisbane: Caboolture Hinterland, Lockyer Valley – East Sydney - Baulkham Hills and Hawkesbury, Sydney - Outer West and Blue Mountains<br>ACT: Urriarra – Namadgi<br>Melbourne: Macedon Ranges, Nillumbik – Kinglake<br>Hobart: East (Sorell - Dodges Ferry)<br>Adelaide: One Tree Hill, Adelaide Hills<br>Perth: North (Carabooda – Pinjar), East (Lesmurdie - Bickley – Carmel), Southeast (Serpentine - Jarrahdale)                                                 |
| Flood      | Queensland: southwestern inland South Australia: northeast corner (outback)                                                                                                                                            | Along the Brisbane River towards Lake Wivenhoe in Brisbane, along the Parramatta River linking to Lake Burrigorang and the outbound ocean harbour in Sydney, along the Murrumbidgee River and Tumut River linking to Eucumbene Dam in ACT, along the Swan River bringing the ocean water toward inland in Perth, along the Adelaide River on the southeast edge of Darwin and along the River Derwent bringing the ocean water to Meadowbank Dam and Meadowbank Lake. |

**Table S11.** Statistic summary of the vulnerability index in earthquake-affected and non-hazard areas

| <b>Region</b>                       | <b>Mean</b> | <b>Std. Dev</b> | <b>Min</b> | <b>Max</b> | <b>Number</b> |
|-------------------------------------|-------------|-----------------|------------|------------|---------------|
| <i><b>Hazard-affected areas</b></i> |             |                 |            |            |               |
| Sydney                              | 0.90        | 3.02            | -14.04     | 33.24      | 10817         |
| Rest of NSW                         | -0.20       | 3.14            | -10.81     | 59.57      | 5421          |
| Melbourne                           | -0.48       | 2.41            | -15.26     | 51.24      | 10130         |
| Rest of Vic.                        | -0.49       | 2.36            | -9.89      | 17.12      | 3575          |
| Brisbane                            | —           | —               | —          | —          | —             |
| Rest of Qld                         | 8.18        | 7.18            | -1.49      | 20.07      | 39            |
| Adelaide                            | 0.15        | 2.47            | -30.42     | 13.00      | 3133          |
| Rest of SA                          | 0.21        | 2.89            | -9.60      | 23.52      | 988           |
| Perth                               | -0.81       | 2.33            | -16.37     | 15.11      | 4420          |
| Rest of WA                          | 0.35        | 4.00            | -12.82     | 48.50      | 1573          |
| Hobart                              | —           | —               | —          | —          | —             |
| Rest of Tas.                        | 0.01        | 2.12            | -5.25      | 13.22      | 223           |
| Darwin                              | -0.62       | 4.02            | -18.06     | 19.47      | 308           |
| Rest of NT                          | 8.64        | 6.96            | -3.51      | 22.41      | 74            |
| Australian Capital Territory        | -2.45       | 2.17            | -19.22     | 11.57      | 1026          |
| <i><b>Non-hazard areas</b></i>      |             |                 |            |            |               |
| Sydney                              | -0.46       | 2.60            | -12.41     | 12.82      | 424           |
| Rest of NSW                         | 0.19        | 2.80            | -9.74      | 15.87      | 2036          |
| Melbourne                           | -0.45       | 2.20            | -5.96      | 8.16       | 133           |
| Rest of Vic.                        | -0.08       | 2.29            | -4.92      | 9.91       | 409           |
| Brisbane                            | 0.10        | 3.08            | -20.27     | 33.96      | 5179          |
| Rest of Qld                         | -0.17       | 2.85            | -10.70     | 69.09      | 5920          |
| Adelaide                            | 0.41        | 2.03            | -3.54      | 8.77       | 79            |
| Rest of SA                          | -0.13       | 2.69            | -21.99     | 14.45      | 291           |
| Perth                               | -0.38       | 2.70            | -16.37     | 7.84       | 180           |
| Rest of WA                          | 1.22        | 5.78            | -12.82     | 38.51      | 203           |
| Hobart                              | 0.76        | 3.21            | -11.49     | 16.51      | 562           |
| Rest of Tas.                        | -0.23       | 1.95            | -5.25      | 13.22      | 664           |
| Darwin                              | -0.85       | 3.33            | -5.75      | 7.86       | 24            |
| Rest of NT                          | 6.58        | 7.36            | -4.84      | 25.33      | 219           |
| Australian Capital Territory        | -0.46       | 2.60            | -12.41     | 12.82      | 424           |

**Note 5 ((Details of the most vulnerable areas highly risky in flood and wildfire)**

The mean values and ranges of the vulnerability index in wildfire-affected areas vary substantially across urban and rural areas (Supplementary Figure S10 with the statistical summary provided in Supplementary Table S11). Its mean is highest in Brisbane (13.844), followed by rural West Australia (10.198) and Darwin (7.956) while lowest in rural Victoria (-0.965), followed by rural Tasmania (-0.433) and rural New South Wales (-0.380). In New South Wales, Queensland, Tasmania and Northern Territory, the ranges of the vulnerability index in wildfire-affected urban areas are wider than its ranges in rural areas, while oppositely in Victoria, South Australia, and West Australia.

The mean values and ranges of the vulnerability index in flood-affected areas vary substantially across urban and rural areas (Supplementary Figure S11 with the statistical

summary provided in Supplementary Table S12). Its mean is highest in Darwin as the urban areas of Northern Territory (17.534), followed by rural Northern Territory (9.228) and rural South Australia (7.003) while lowest in rural Victoria (-0.952), followed by rural New South Wales (-0.713) and rural Tasmania (-0.710). The ranges of the vulnerability index in flood-affected areas is widest in rural New South Wales (-10.168 to 51.985), followed by its counterpart Sydney (-11.362 to 29.666) and Brisbane as the urban areas of Queensland (-10.257 to 22.467). Moreover, the ranges of the vulnerability index in flood-affected areas are relatively narrow in Tasmania (-3.651 to 10.197 in urban areas and -4.540 to 4.287 in rural areas) and Darwin as the urban areas in Northern Territory (13.670 to 19.465) compared to other states.

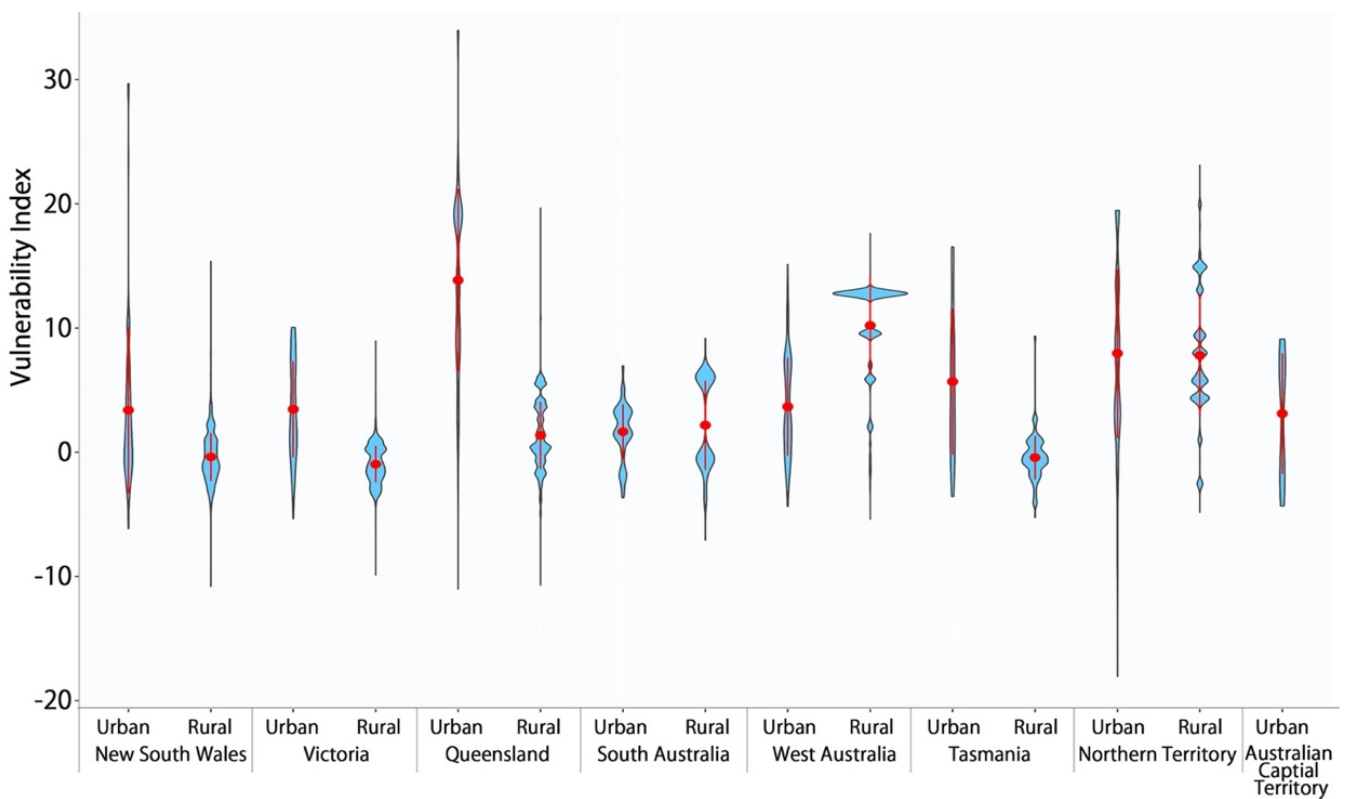

**Figure S10.** Distribution of the vulnerability index in wildfire-affected areas (statistical details in Supplementary Table S11)

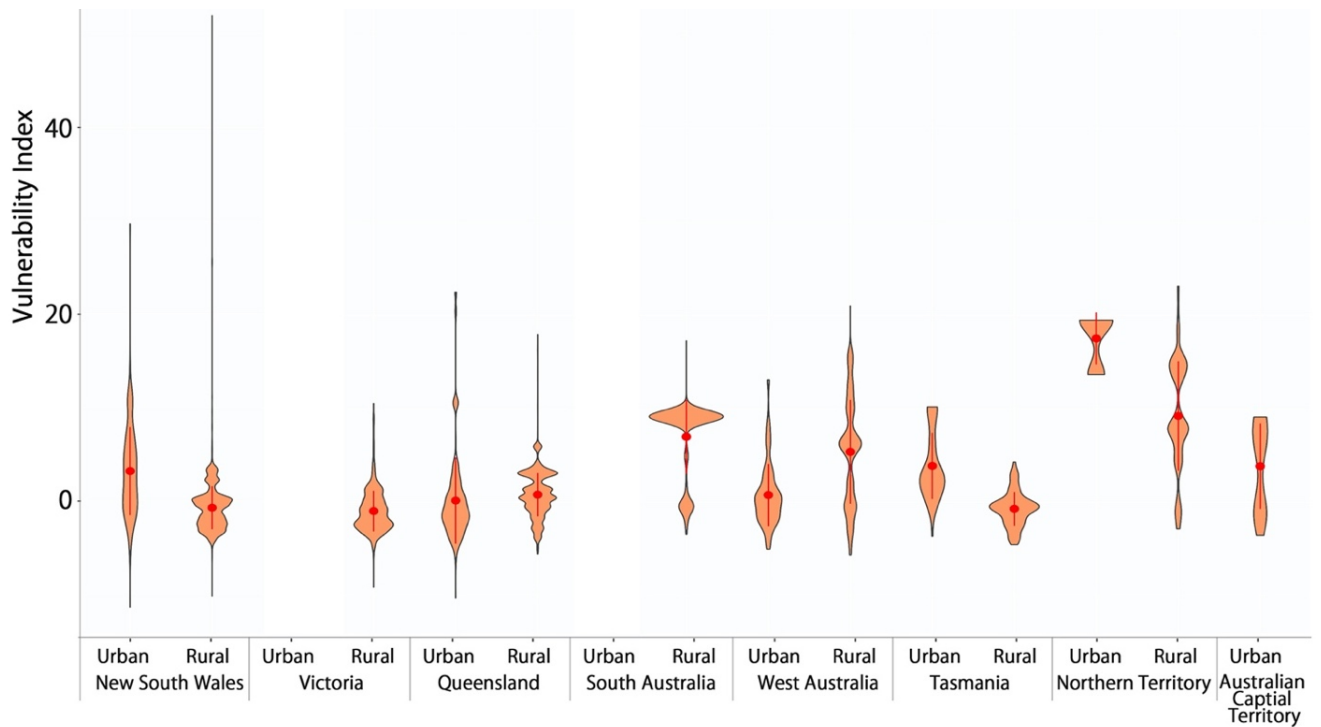

**Figure S11.** Distribution of the vulnerability index in flood-affected areas (statistical details in Supplementary Table S12)

**Table S12.** Statistic summary of vulnerability index in wildfire-affected and non-hazard areas

| <b>Region</b>                       | <b>Mean</b> | <b>Std. Dev</b> | <b>Min</b> | <b>Max</b> | <b>Number</b> |
|-------------------------------------|-------------|-----------------|------------|------------|---------------|
| <i><b>Hazard-affected areas</b></i> |             |                 |            |            |               |
| Sydney                              | 3.39        | 6.70            | -6.15      | 29.67      | 978           |
| Rest of NSW                         | -0.38       | 1.94            | -10.81     | 15.36      | 7769          |
| Melbourne                           | 3.46        | 3.88            | -5.35      | 10.04      | 302           |
| Rest of Vic.                        | -0.97       | 1.48            | -9.89      | 8.95       | 5082          |
| Brisbane                            | 13.84       | 7.37            | -11.02     | 33.96      | 6724          |
| Rest of Qld                         | 1.36        | 2.71            | -10.70     | 19.66      | 242810        |
| Adelaide                            | 1.66        | 2.22            | -3.67      | 6.94       | 190           |
| Rest of SA                          | 2.17        | 3.60            | -7.08      | 9.16       | 3427          |
| Perth                               | 3.66        | 3.95            | -4.35      | 15.11      | 473           |
| Rest of WA                          | 10.20       | 3.97            | -5.40      | 17.62      | 64838         |
| Hobart                              | 5.68        | 5.90            | -3.56      | 16.51      | 152           |
| Rest of Tas.                        | -0.43       | 1.76            | -5.25      | 9.32       | 1737          |
| Darwin                              | 7.96        | 6.82            | -18.06     | 19.47      | 1730          |
| Rest of NT                          | 7.80        | 4.96            | -4.84      | 23.10      | 311277        |
| Australian Capital Territory        | 3.11        | 4.86            | -4.33      | 9.10       | 44            |
| <i><b>Non-hazard areas</b></i>      |             |                 |            |            |               |
| Sydney                              | 1.32        | 4.40            | -14.04     | 33.24      | 11098         |
| Rest of NSW                         | -0.08       | 2.78            | -10.81     | 59.57      | 9908          |
| Melbourne                           | -0.48       | 2.43            | -15.26     | 51.24      | 10004         |
| Rest of Vic.                        | -0.45       | 2.14            | -9.89      | 17.12      | 5193          |
| Brisbane                            | 2.42        | 6.71            | -20.27     | 33.96      | 6092          |
| Rest of Qld                         | 2.00        | 2.55            | -10.70     | 69.09      | 136627        |
| Adelaide                            | 0.15        | 2.47            | -30.42     | 13.00      | 3069          |

|                              |       |      |        |       |        |
|------------------------------|-------|------|--------|-------|--------|
| Rest of SA                   | 1.73  | 3.66 | -21.99 | 23.52 | 2616   |
| Perth                        | -0.66 | 2.60 | -16.37 | 15.11 | 4419   |
| Rest of WA                   | 9.01  | 5.41 | -12.82 | 48.50 | 18553  |
| Hobart                       | 1.85  | 4.29 | -11.49 | 16.51 | 660    |
| Rest of Tas.                 | 0.01  | 2.11 | -5.25  | 13.22 | 1614   |
| Darwin                       | 5.40  | 7.17 | -18.06 | 19.47 | 937    |
| Rest of NT                   | 8.29  | 4.80 | -4.84  | 25.33 | 138582 |
| Australian Capital Territory | -2.44 | 2.19 | -19.22 | 11.57 | 1027   |

**Table S13.** Statistic summary of vulnerability index in flood-affected and non-hazard areas

| <b>Region</b>                       | <b>Mean</b> | <b>Std. Dev</b> | <b>Min</b> | <b>Max</b> | <b>Number</b> |
|-------------------------------------|-------------|-----------------|------------|------------|---------------|
| <i><b>Hazard-affected areas</b></i> |             |                 |            |            |               |
| Sydney                              | 3.21        | 4.73            | -6.15      | 29.67      | 978           |
| Rest of NSW                         | -0.71       | 2.32            | -10.81     | 15.36      | 7769          |
| Melbourne                           | —           | —               | —          | —          | —             |
| Rest of Vic.                        | -0.95       | 2.19            | -9.89      | 8.95       | 5082          |
| Brisbane                            | 0.17        | 4.62            | -11.02     | 33.96      | 6724          |
| Rest of Qld                         | 0.81        | 2.33            | -10.70     | 19.66      | 242810        |
| Adelaide                            | —           | —               | —          | —          | —             |
| Rest of SA                          | 7.00        | 3.97            | -7.08      | 9.16       | 3427          |
| Perth                               | 0.77        | 3.35            | -4.35      | 15.11      | 473           |
| Rest of WA                          | 5.38        | 5.58            | -5.40      | 17.62      | 64838         |
| Hobart                              | 3.88        | 3.55            | -3.56      | 16.51      | 152           |
| Rest of Tas.                        | -0.71       | 1.83            | -5.25      | 9.32       | 1737          |
| Darwin                              | 17.53       | 2.79            | -18.06     | 19.47      | 1730          |
| Rest of NT                          | 9.23        | 5.86            | -4.84      | 23.10      | 311277        |
| Australian Capital Territory        | 3.85        | 4.59            | -4.33      | 9.10       | 44            |
| <i><b>Non-hazard areas</b></i>      |             |                 |            |            |               |
| Sydney                              | 0.90        | 3.02            | -14.04     | 33.24      | 10759         |
| Rest of NSW                         | -0.42       | 2.83            | -10.81     | 59.57      | 11149         |
| Melbourne                           | -0.49       | 2.41            | -15.26     | 51.24      | 9982          |
| Rest of Vic.                        | -0.58       | 2.29            | -9.89      | 17.12      | 4092          |
| Brisbane                            | 0.21        | 3.21            | -20.27     | 33.96      | 4968          |
| Rest of Qld                         | 0.29        | 2.76            | -10.70     | 69.09      | 10042         |
| Adelaide                            | 0.12        | 2.46            | -30.42     | 13.00      | 3039          |
| Rest of SA                          | 3.73        | 4.93            | -21.99     | 23.52      | 2053          |
| Perth                               | -0.86       | 2.30            | -16.37     | 15.11      | 4319          |
| Rest of WA                          | 3.53        | 6.03            | -12.82     | 48.50      | 3816          |
| Hobart                              | 0.93        | 3.48            | -11.49     | 16.51      | 574           |
| Rest of Tas.                        | 0.19        | 2.42            | -5.25      | 13.22      | 1020          |
| Darwin                              | -0.47       | 4.25            | -18.06     | 19.47      | 315           |
| Rest of NT                          | 10.18       | 5.83            | -4.84      | 25.33      | 1129          |
| Australian Capital Territory        | -2.45       | 2.17            | -19.22     | 11.57      | 1026          |

**Table S14. Inequity index of vulnerability in hazard-affected areas**

|                   | New South Wales |        | Victoria |        | Queensland |         | South Australia |        | West Australia |        | Tasmania |        | Northern Territory |         | Australian Capital Territory |
|-------------------|-----------------|--------|----------|--------|------------|---------|-----------------|--------|----------------|--------|----------|--------|--------------------|---------|------------------------------|
|                   | Urban           | Rural  | Urban    | Rural  | Urban      | Rural   | Urban           | Rural  | Urban          | Rural  | Urban    | Rural  | Urban              | Rural   | Urban                        |
| <i>Wildfire</i>   |                 |        |          |        |            |         |                 |        |                |        |          |        |                    |         |                              |
| <i>k=0.25</i>     | -1.031          | -0.526 | -1.225   | -0.347 | -2.174     | -0.670  | -0.758          | -0.424 | -1.079         | -0.985 | -1.786   | -0.317 | -4.829             | -5.433  | -1.019                       |
| <i>k=0.5</i>      | -1.695          | -1.086 | -2.059   | -0.740 | -4.186     | -1.269  | -1.348          | -0.801 | -1.777         | -1.463 | -2.709   | -0.606 | -10.634            | -7.927  | -1.545                       |
| <i>k=0.75</i>     | -2.234          | -2.064 | -2.665   | -1.403 | -6.650     | -2.212  | -1.777          | -1.234 | -2.303         | -1.833 | -3.307   | -0.892 | -13.462            | -9.185  | -1.881                       |
| <i>Earthquake</i> |                 |        |          |        |            |         |                 |        |                |        |          |        |                    |         |                              |
| <i>k=0.25</i>     | -0.969          | -0.874 | -0.639   | -0.614 | —          | -4.742  | -2.620          | -0.706 | -0.677         | -1.153 | —        | -0.440 | -2.950             | -4.641  | -0.795                       |
| <i>k=0.5</i>      | -1.948          | -1.616 | -1.435   | -1.174 | —          | -6.533  | -14.519         | -1.350 | -2.330         | -2.197 | —        | -0.779 | -7.903             | -6.928  | -3.989                       |
| <i>k=0.75</i>     | -5.740          | -3.894 | -5.174   | -2.778 | —          | -11.007 | -29.772         | -3.376 | -8.237         | -6.198 | —        | -1.641 | -16.091            | -12.224 | -11.658                      |
| <i>Flood</i>      |                 |        |          |        |            |         |                 |        |                |        |          |        |                    |         |                              |
| <i>k=0.25</i>     | -1.774          | -0.889 | —        | -0.753 | -0.665     | -0.647  | —               | -0.675 | -0.807         | -1.803 | -0.873   | -0.426 | -0.969             | -4.792  | -2.240                       |
| <i>k=0.5</i>      | -4.168          | -1.634 | —        | -1.396 | -1.269     | -1.141  | —               | -1.093 | -1.376         | -2.664 | -1.594   | -0.798 | -1.619             | -6.985  | -3.387                       |
| <i>k=0.75</i>     | -6.650          | -2.606 | —        | -2.124 | -2.047     | -1.576  | —               | -1.402 | -1.832         | -3.275 | -2.306   | -1.123 | -1.991             | -8.041  | -4.005                       |



**Table S15.** Reclassification of PoI data with data format indicated in the bracket

|    | <b>Main type (format)</b>                                                                                                                                                                                                                                                                                                                                                                                           |
|----|---------------------------------------------------------------------------------------------------------------------------------------------------------------------------------------------------------------------------------------------------------------------------------------------------------------------------------------------------------------------------------------------------------------------|
| 1  | Building (area)                                                                                                                                                                                                                                                                                                                                                                                                     |
| 2  | Railway (line)                                                                                                                                                                                                                                                                                                                                                                                                      |
| 3  | Road (line)                                                                                                                                                                                                                                                                                                                                                                                                         |
| 4  | Traffic connections (point): crossing, roundabout, motorway junctions, slipway, stop signs, traffic signals, and turning circles.                                                                                                                                                                                                                                                                                   |
| 5  | Parking (point): on-ground, underground, multistorey parking, bicycle parking, vending parking                                                                                                                                                                                                                                                                                                                      |
| 6  | Services (point): gas/fuel station                                                                                                                                                                                                                                                                                                                                                                                  |
| 7  | City/town centres (point)                                                                                                                                                                                                                                                                                                                                                                                           |
| 8  | Streep lamps (point)                                                                                                                                                                                                                                                                                                                                                                                                |
| 9  | Transport stops (point): stops of all types of public transit                                                                                                                                                                                                                                                                                                                                                       |
| 10 | Public transits (area): bus, tram, railway, ferry                                                                                                                                                                                                                                                                                                                                                                   |
| 11 | Relax design (point): bench                                                                                                                                                                                                                                                                                                                                                                                         |
| 12 | Dining (point): café, bar, fast food, pub, nightclub, food court, biergarten, bed and breakfast, restaurant,                                                                                                                                                                                                                                                                                                        |
| 13 | Commercial: Supermarket, convenience, hairdresser, clothes, pharmacy, beverages, bakery, butcher, car dealership, department store, beauty shops, laundry, bicycle shops, gift shops, newsagent, furniture shop, greengrocer, jeweller, florist, outdoor shop, bookshop, shoe shop, sports shop, chemist, mobile phone shop, cinema, optician, computer shops, toy shops, general, market place, mall, video shops. |
| 14 | Recreational (point): tourist Information centre, viewpoint, camp site, picnic site, attraction, memorial, monument, caravan site, part, fountain, swimming pool, observation tower, archaeological, car rental, bicycle rental, theatre, garden centre, lighthouse, dog park, golf course, theme park, zoo, castle, ice rink, battlefield, playground, sport centre, stadium,                                      |
| 15 | Communication (point): telecommunication towers                                                                                                                                                                                                                                                                                                                                                                     |
| 16 | Financial (point): bank, ATM                                                                                                                                                                                                                                                                                                                                                                                        |
| 17 | Art (point): artwork, museum, art centre.                                                                                                                                                                                                                                                                                                                                                                           |
| 18 | Accommodation (point): hotel, hostel, motel, guesthouse                                                                                                                                                                                                                                                                                                                                                             |
| 19 | Healthcare facilities (point): hospital, Doctors, dentist, nursing home                                                                                                                                                                                                                                                                                                                                             |
| 20 | Education (point): School, kindergarten, college, university,                                                                                                                                                                                                                                                                                                                                                       |
| 21 | Waster facilities (point): recycling, recycling clothes, wastewater plant, recycling paper, recycling metal,                                                                                                                                                                                                                                                                                                        |
| 22 | Public services (point): town hall, embassy, public building, post box, telephone, post office, Police station, Fire station, community centre, library                                                                                                                                                                                                                                                             |
| 23 | Veterinary (point)                                                                                                                                                                                                                                                                                                                                                                                                  |
| 24 | Drinking water (point)                                                                                                                                                                                                                                                                                                                                                                                              |

## Note 6 (Generating NDBI)

The below code is used to generate NDBI in the developer's portal via Google Earth Engine.

```
var visParam = {
  min:157.8104761904762,
  max:2002.4276190476191,
  bands: ['B4','B3','B2'],
}
var s2 = ee.ImageCollection("COPERNICUS/S2");
var filtered = s2.filter(ee.Filter.lt('CLOUDY_PIXEL_PERCENTAGE', 25))
  .filter(ee.Filter.date('2020-10-01', '2021-03-31'))
  .filter(ee.Filter.bounds(australia))

var image = filtered.median();
Map.addLayer(image, visParam, 'collection');

// Calculate Normalized Difference Vegetation Index (NDVI)
// 'SWIR' (B11) and 'NIR' (B8)
var ndvi = image.normalizedDifference(['B11', 'B8']).rename(['ndbi']);
var palette = ['blue','white','red']
var ndviVis = {min:-1, max:1, palette: palette}
Map.addLayer(ndvi.clip(australia), ndviVis, 'ndbi')

// mean land surface temperature value for SA1
var mean = ndvi.reduceRegions({
  collection: sa1,
  reducer: ee.Reducer.mean(),
  scale: 10, //metres
});
// // // Exporting image as CSV and GEOTIFF
Export.table.toDrive({
  collection: mean,
  folder: 'imageToDriveExample',
  fileFormat: 'csv',
});
```

**Table S16.** Sensitivity analysis of vulnerability index in urban areas based on three scenarios

| Scenario 1 – 10 PC                                                                                |                             |       | Scenario 2 – 12 PC                                                                                |                             |       | Scenario 3 – 17 PC                                                                                |                               |       |
|---------------------------------------------------------------------------------------------------|-----------------------------|-------|---------------------------------------------------------------------------------------------------|-----------------------------|-------|---------------------------------------------------------------------------------------------------|-------------------------------|-------|
| Cumulative % = 69.45<br>KMO test = 0.794 (Sig < 0.001)<br>Bartlett's test of sphericity = 1299179 |                             |       | Cumulative % = 74.58<br>KMO test = 0.794 (Sig < 0.001)<br>Bartlett's test of sphericity = 1299179 |                             |       | Cumulative % = 84.69<br>KMO test = 0.794 (Sig < 0.001)<br>Bartlett's test of sphericity = 1299179 |                               |       |
| PC 1                                                                                              | No car                      | 0.799 | PC 1                                                                                              | Age above 65                | 0.938 | PC 1                                                                                              | Age above 65                  | 0.931 |
|                                                                                                   | Multi-unit houses           | 0.779 |                                                                                                   | Median age                  | 0.908 |                                                                                                   | Median age                    | 0.898 |
|                                                                                                   | Renters                     | 0.764 |                                                                                                   | Not labour force            | 0.789 |                                                                                                   | Not labour force              | 0.819 |
| PC 2                                                                                              | Age above 65                | 0.942 |                                                                                                   | Need assistance             | 0.721 |                                                                                                   | Need assistance               | 0.732 |
|                                                                                                   | Median age                  | 0.924 | PC 2                                                                                              | Renters                     | 0.835 | PC 2                                                                                              | Non-English speaker           | 0.905 |
|                                                                                                   | Not labour force            | 0.806 |                                                                                                   | No car                      | 0.803 |                                                                                                   | Minority                      | 0.891 |
|                                                                                                   | Need assistance             | 0.706 |                                                                                                   | Multi-unit houses           | 0.798 |                                                                                                   | Bad English                   | 0.791 |
| PC 3                                                                                              | Non-English speaker         | 0.909 | PC 3                                                                                              | Non-English speaker         | 0.908 |                                                                                                   | Ethnic diversity              | 0.767 |
|                                                                                                   | Minority                    | 0.859 |                                                                                                   | Minority                    | 0.858 | PC 3                                                                                              | Renters                       | 0.846 |
|                                                                                                   | Bad English                 | 0.835 |                                                                                                   | Bad English                 | 0.837 |                                                                                                   | No car                        | 0.804 |
| PC 4                                                                                              | Distance to commercial      | 0.841 | PC 4                                                                                              | Ethnic diversity            | 0.714 | PC 4                                                                                              | Multi-unit houses             | 0.766 |
|                                                                                                   | Distance to public transits | 0.782 |                                                                                                   | Non-MPA occupation          | 0.865 |                                                                                                   | Non-MPA occupation            | 0.822 |
|                                                                                                   | Distance to public service  | 0.728 |                                                                                                   | Low education               | 0.768 |                                                                                                   | Low income                    | 0.798 |
|                                                                                                   | Distance to healthcare      | 0.715 |                                                                                                   | Low income                  | 0.700 |                                                                                                   | Low education                 | 0.779 |
| PC 5                                                                                              | Non-MPA occupation          | 0.859 | PC 5                                                                                              | Distance to commercial      | 0.842 | PC 5                                                                                              | Density of roads and railways | 0.999 |
|                                                                                                   | Low education               | 0.761 |                                                                                                   | Distance to public transits | 0.786 | PC 6                                                                                              | Distance to commercial        | 0.830 |
| PC 6                                                                                              | Connectivity design         | 0.999 |                                                                                                   | Distance to public service  | 0.732 |                                                                                                   | Distance to public service    | 0.801 |

|       |                               |        |       |                               |       |       |                             |       |
|-------|-------------------------------|--------|-------|-------------------------------|-------|-------|-----------------------------|-------|
|       | Density of buildings          | 0.999  |       | Distance to healthcare        | 0.717 |       | Distance to healthcare      | 0.774 |
|       | Density of roads and railways | 0.999  | PC 6  | Connectivity design           | 0.999 |       | Distance to public transits | 0.733 |
| PC 7  | No internet                   | 0.619  |       | Density of buildings          | 0.999 | PC 7  | Need child care             | 0.743 |
| PC 8  | Distance to cities            | 0.796  |       | Density of roads and railways | 0.999 |       | Age 0-18                    | 0.703 |
| PC 9  | Mobile living                 | -0.782 | PC 7  | Need child care               | 0.668 |       | Not married                 | 0.686 |
| PC 10 | Street design                 | 0.886  |       | Age 0-18                      | 0.636 | PC 8  | Retired village             | 0.961 |
|       |                               |        | PC 8  | Retired village               | 0.846 | PC 9  | Indigenous                  | 0.867 |
|       |                               |        | PC 9  | Distance to cities            | 0.835 | PC 10 | Distance to cities          | 0.972 |
|       |                               |        | PC 10 | Mobile living                 | 0.973 | PC 11 | Female                      | 0.908 |
|       |                               |        | PC 11 | Diversity of land use         | 0.971 | PC 12 | Mobile living               | 0.989 |
|       |                               |        | PC 12 | Street design                 | 0.998 | PC 13 | Diversity of housing        | 0.939 |
|       |                               |        |       |                               |       | PC 14 | Multi-family HH             | 0.807 |
|       |                               |        |       |                               |       | PC 15 | Diversity of land use       | 0.990 |
|       |                               |        |       |                               |       | PC 16 | Street design               | 0.999 |
|       |                               |        |       |                               |       | PC 17 | Distance to roads           | 0.848 |

**Table S17.** Pairwise Pearson’s correlation of vulnerability index in urban areas (N=55,195)

|                    | Scenario 1 (10 PC) | Scenario 2 (12 PC) | Scenario 3 (17 PC) |
|--------------------|--------------------|--------------------|--------------------|
| Scenario 1 (10 PC) | 1                  |                    |                    |
| Scenario 2 (12 PC) | .813**             | 1                  |                    |
| Scenario 3 (17 PC) | .761**             | .773**             | 1                  |

Note: \*\*:  $p < 0.01$ ; PC = principal components

**Table 18.** One sample T statistics of vulnerability index in urban areas

|                    | T-statistics | Sig. (2-tailed) | Mean Difference | 95% CI            |
|--------------------|--------------|-----------------|-----------------|-------------------|
| Scenario 1 (10 PC) | 0            | 1               | 0.00E+00        | (-0.0331, 0.0331) |
| Scenario 2 (12 PC) | 0            | 1               | -1.43E-12       | (-0.0362, 0.0362) |
| Scenario 3 (17 PC) | 0            | 1               | -2.36E-12       | (-0.0431, 0.0431) |

Note: CI = Confidence intervals

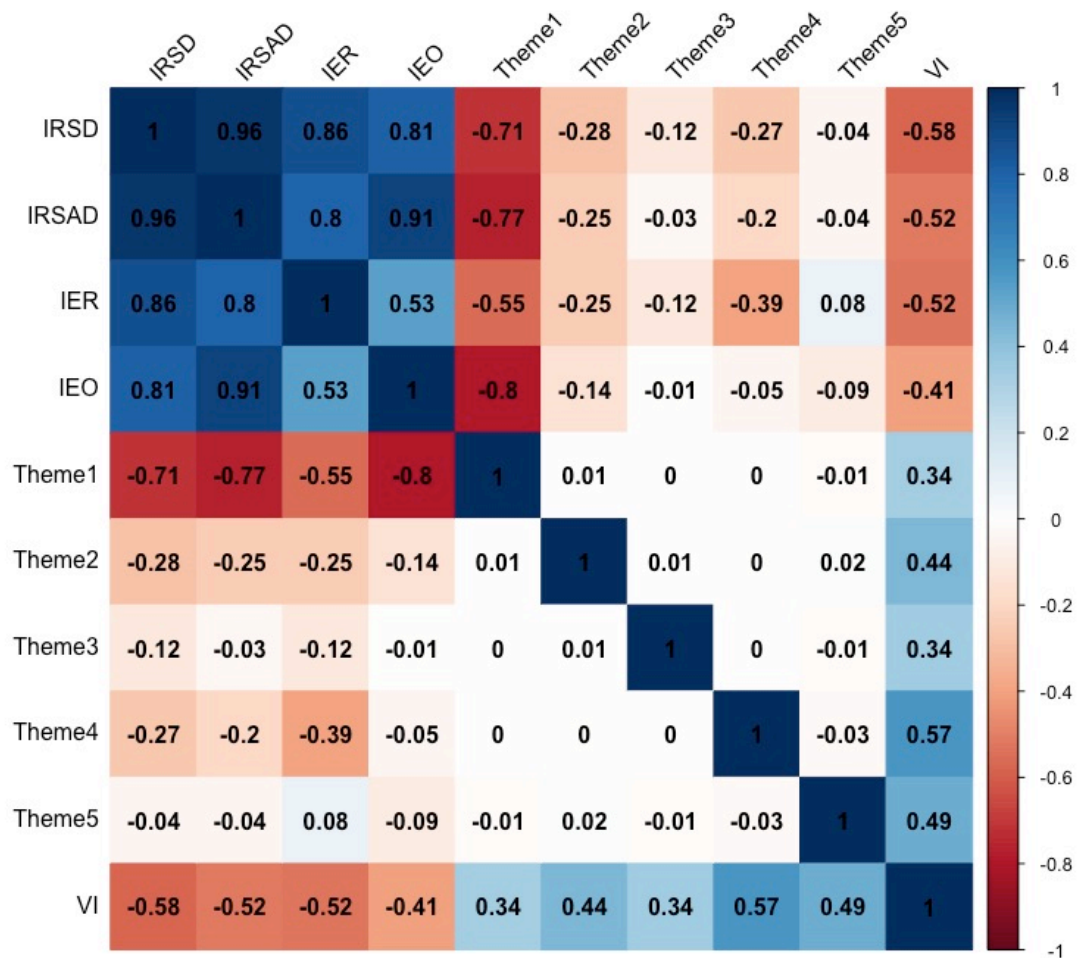

**Figure S12.** Correlations between four indices of SEIFA and our measures of vulnerability index. IRSD = Index of Relative Socio-Economic Disadvantage; IRSAD = Index of Relative Socio-Economic Advantage and Disadvantage; IEO = Index of Education and Occupation; IER = Index of Economic Resources; VI = vulnerability index; Theme 1: socioeconomic status; Theme 2: demographic composition & disability; Theme 3: minority status & language; Theme 4: housing type & transportation; Theme 5: built environment

## Supplementary Reference

- Australia Bureau of Statistics (2016). 1270.0.55.001 - Australian Statistical Geography Standard (ASGS): Volume 1 - Main Structure and Greater Capital City Statistical Areas, July 2016. Available at: [https://www.abs.gov.au/ausstats/abs@.nsf/Lookup/by%20Subject/1270.0.55.001~July%202016~Main%20Features~Greater%20Capital%20City%20Statistical%20Areas%20\(GCCSA\)~10003](https://www.abs.gov.au/ausstats/abs@.nsf/Lookup/by%20Subject/1270.0.55.001~July%202016~Main%20Features~Greater%20Capital%20City%20Statistical%20Areas%20(GCCSA)~10003)
- Australia Bureau of Statistics (2022). Population. Available at: <https://www.abs.gov.au/statistics/people/population>
- Akinola, O. V., J. Adegoke and T. E. Ologunorisa (2019). "Assessment of Social Vulnerability to Wildfire in Missouri, United States of America." Journal of Sustainable Development **12**(4).
- Aksha, S. K., L. Juran, L. M. Resler and Y. Zhang (2019). "An analysis of social vulnerability to natural hazards in Nepal using a modified social vulnerability index." International Journal of Disaster Risk Science **10**(1): 103-116.
- Berke, P., S. Yu, M. Malecha and J. Cooper (2019). "Plans that disrupt development: Equity policies and social vulnerability in six coastal cities." Journal of Planning Education and Research: 0739456X19861144.
- Brodie, M., E. Weltzien, D. Altman, R. J. Blendon and J. M. Benson (2006). "Experiences of Hurricane Katrina evacuees in Houston shelters: Implications for future planning." American Journal of Public Health **96**(8): 1402-1408.
- Burton, C. and S. L. Cutter (2008). "Levee failures and social vulnerability in the Sacramento-San Joaquin Delta area, California." Natural hazards review **9**(3): 136-149.
- Center, E. H. J. H. I. and H. H. John (2000). The hidden costs of coastal hazards: Implications for risk assessment and mitigation, Island Press.
- Chen, W., S. L. Cutter, C. T. Emrich and P. Shi (2013). "Measuring social vulnerability to natural hazards in the Yangtze River Delta region, China." International Journal of Disaster Risk Science **4**(4): 169-181.
- Cumberbatch, J., C. Drakes, T. Mackey, M. Nagdee, J. Wood, A. K. Degia and C. Hinds (2020). "Social Vulnerability Index: Barbados—A Case Study." Coastal Management **48**(5): 505-526.
- Cutter, S. L., K. D. Ash and C. T. Emrich (2014). "The geographies of community disaster resilience." Global environmental change **29**: 65-77.
- Cutter, S. L., B. J. Boruff and W. L. Shirley (2003). "Social vulnerability to environmental hazards." Social science quarterly **84**(2): 242-261.
- Cutter, S. L., J. T. Mitchell and M. S. Scott (2000). "Revealing the vulnerability of people and places: A case study of Georgetown County, South Carolina." Annals of the association of American Geographers **90**(4): 713-737.
- de Oliveira Mendes, J. M. (2009). "Social vulnerability indexes as planning tools: beyond the preparedness paradigm." Journal of Risk Research **12**(1): 43-58.
- Drakes, O., E. Tate, J. Rainey and S. Brody (2021). "Social vulnerability and short-term disaster assistance in the United States." International Journal of Disaster Risk Reduction **53**: 102010.
- Flanagan, B. E., E. W. Gregory, E. J. Hallisey, J. L. Heitgerd and B. Lewis (2011). "A social vulnerability index for disaster management." Journal of homeland security and emergency management **8**(1).
- Holand, I. S., P. Lujala and J. K. Rød (2011). "Social vulnerability assessment for Norway: A quantitative approach." Norsk Geografisk Tidsskrift-Norwegian Journal of Geography **65**(1): 1-17.

- Kirby, R. H., M. A. Reams, N. S. Lam, L. Zou, G. G. Dekker and D. Fundter (2019). "Assessing social vulnerability to flood hazards in the Dutch Province of Zeeland." International Journal of Disaster Risk Science **10**(2): 233-243.
- Krishnan, P., P. S. Ananthan, R. Purvaja, J. J. J. Jeevamani, J. A. Infantina, C. S. Rao, A. Anand, R. S. Mahendra, I. Sekar and K. Kareemulla (2019). "Framework for mapping the drivers of coastal vulnerability and spatial decision making for climate-change adaptation: A case study from Maharashtra, India." Ambio **48**(2): 192-212.
- Kumar, D. and R. K. Bhattacharjya (2020). "Study of Integrated Social Vulnerability Index SoVI of Hilly Region of Uttarakhand, India." Environmental and Climate Technologies **24**(1): 105-122.
- Mainali, J. and N. G. Pricope (2017). "High-resolution spatial assessment of population vulnerability to climate change in Nepal." Applied Geography **82**: 66-82.
- Martin, S. D., A. C. Bush and J. A. Lynch (2006). "A national survey of terrorism preparedness training among pediatric, family practice, and emergency medicine programs." Pediatrics **118**(3): e620-e626.
- McGuire, L. C., E. S. Ford and C. A. Okoro (2007). "Natural disasters and older US adults with disabilities: Implications for evacuation." Disasters **31**(1): 49-56.
- Mileti, D. (1999). Disasters by design: A reassessment of natural hazards in the United States, Joseph Henry Press.
- Morrow, B. H. (1999). "Identifying and mapping community vulnerability." Disasters **23**(1): 1-18.
- Nicholson, A., A. Attal-Juncqua and S. Wollek (2021). "Exploring Disaster Human Services for Children and Youth."
- Peek-Asa, C., M. Ramirez, H. Seligson and K. Shoaf (2003). "Seismic, structural, and individual factors associated with earthquake related injury." Injury prevention **9**(1): 62-66.
- Prosdociimi, D. and K. Klima (2020). "Health effects of heat vulnerability in Rio de Janeiro: a validation model for policy applications." SN Applied Sciences **2**(12): 1-11.
- Rosenkoetter, M. M., E. K. Covan, B. K. Cobb, S. Bunting and M. Weinrich (2007). "Perceptions of older adults regarding evacuation in the event of a natural disaster." Public Health Nursing **24**(2): 160-168.
- Schmidtlein, M. C., R. C. Deutsch, W. W. Piegorsch and S. L. Cutter (2008). "A sensitivity analysis of the social vulnerability index." Risk Analysis: An International Journal **28**(4): 1099-1114.
- Solangaarachchi, D., A. L. Griffin and M. D. Doherty (2012). "Social vulnerability in the context of bushfire risk at the urban-bush interface in Sydney: a case study of the Blue Mountains and Ku-ring-gai local council areas." Natural hazards **64**(2): 1873-1898.
- Tierney, K. (2011). Social inequality, hazards, and disasters. On risk and disaster, University of Pennsylvania Press: 109-128.
- Wigtil, G., R. B. Hammer, J. D. Kline, M. H. Mockrin, S. I. Stewart, D. Roper and V. C. Radeloff (2016). "Places where wildfire potential and social vulnerability coincide in the coterminous United States." International Journal of Wildland Fire **25**(8): 896-908.
